# Supplementary material for: Polyoxygenated Cembrane Diterpenoids from the Soft Coral Sarcophyton ehrenbergi
Source: PubMed Central journal article supplement (PMC4394524; doi:10.3390/ijms16036140), 2015-03-17
Supplement: ijms-16-06140-s001.pdf [file ijms-16-06140-s001.pdf]

# Supplementary Information

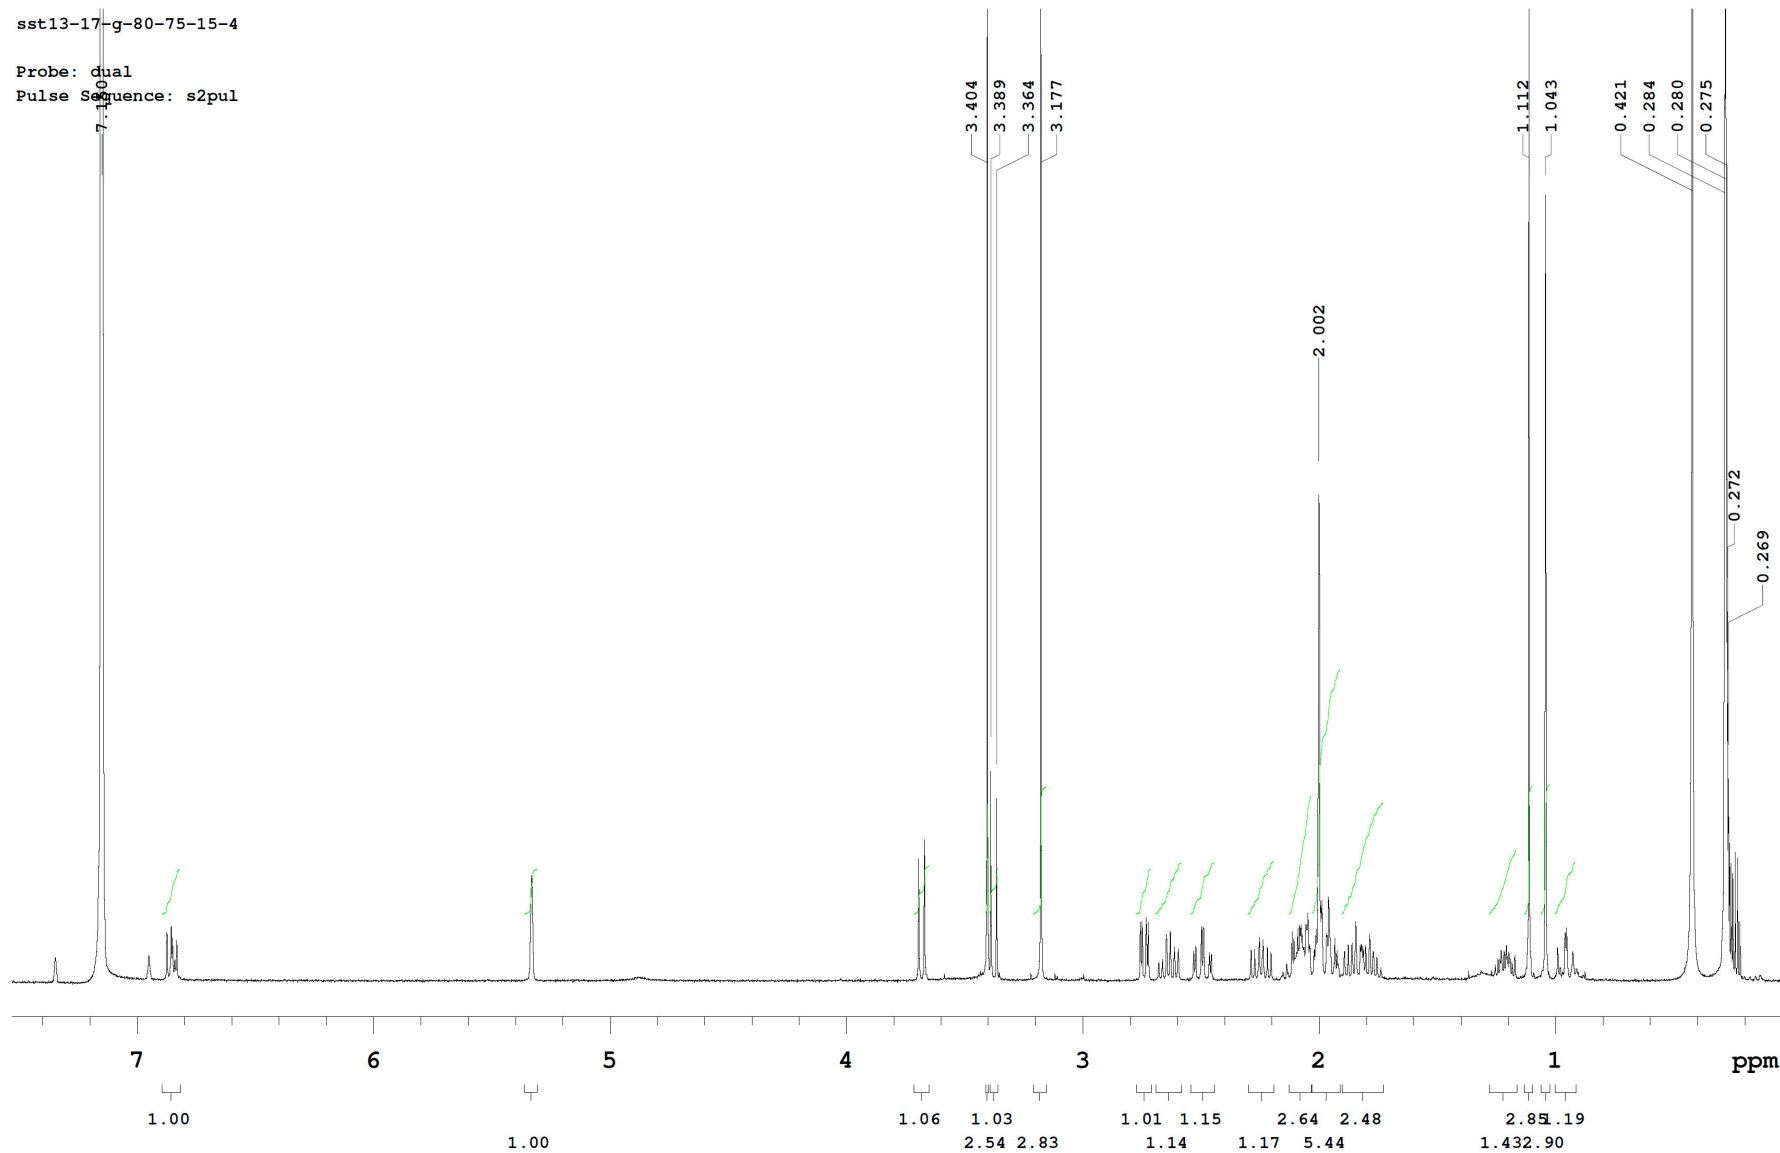

**Figure S1.**  $^1\text{H}$  NMR spectrum (400 MHz) of ehrenbergol D (**1**) in  $\text{C}_6\text{D}_6$ .

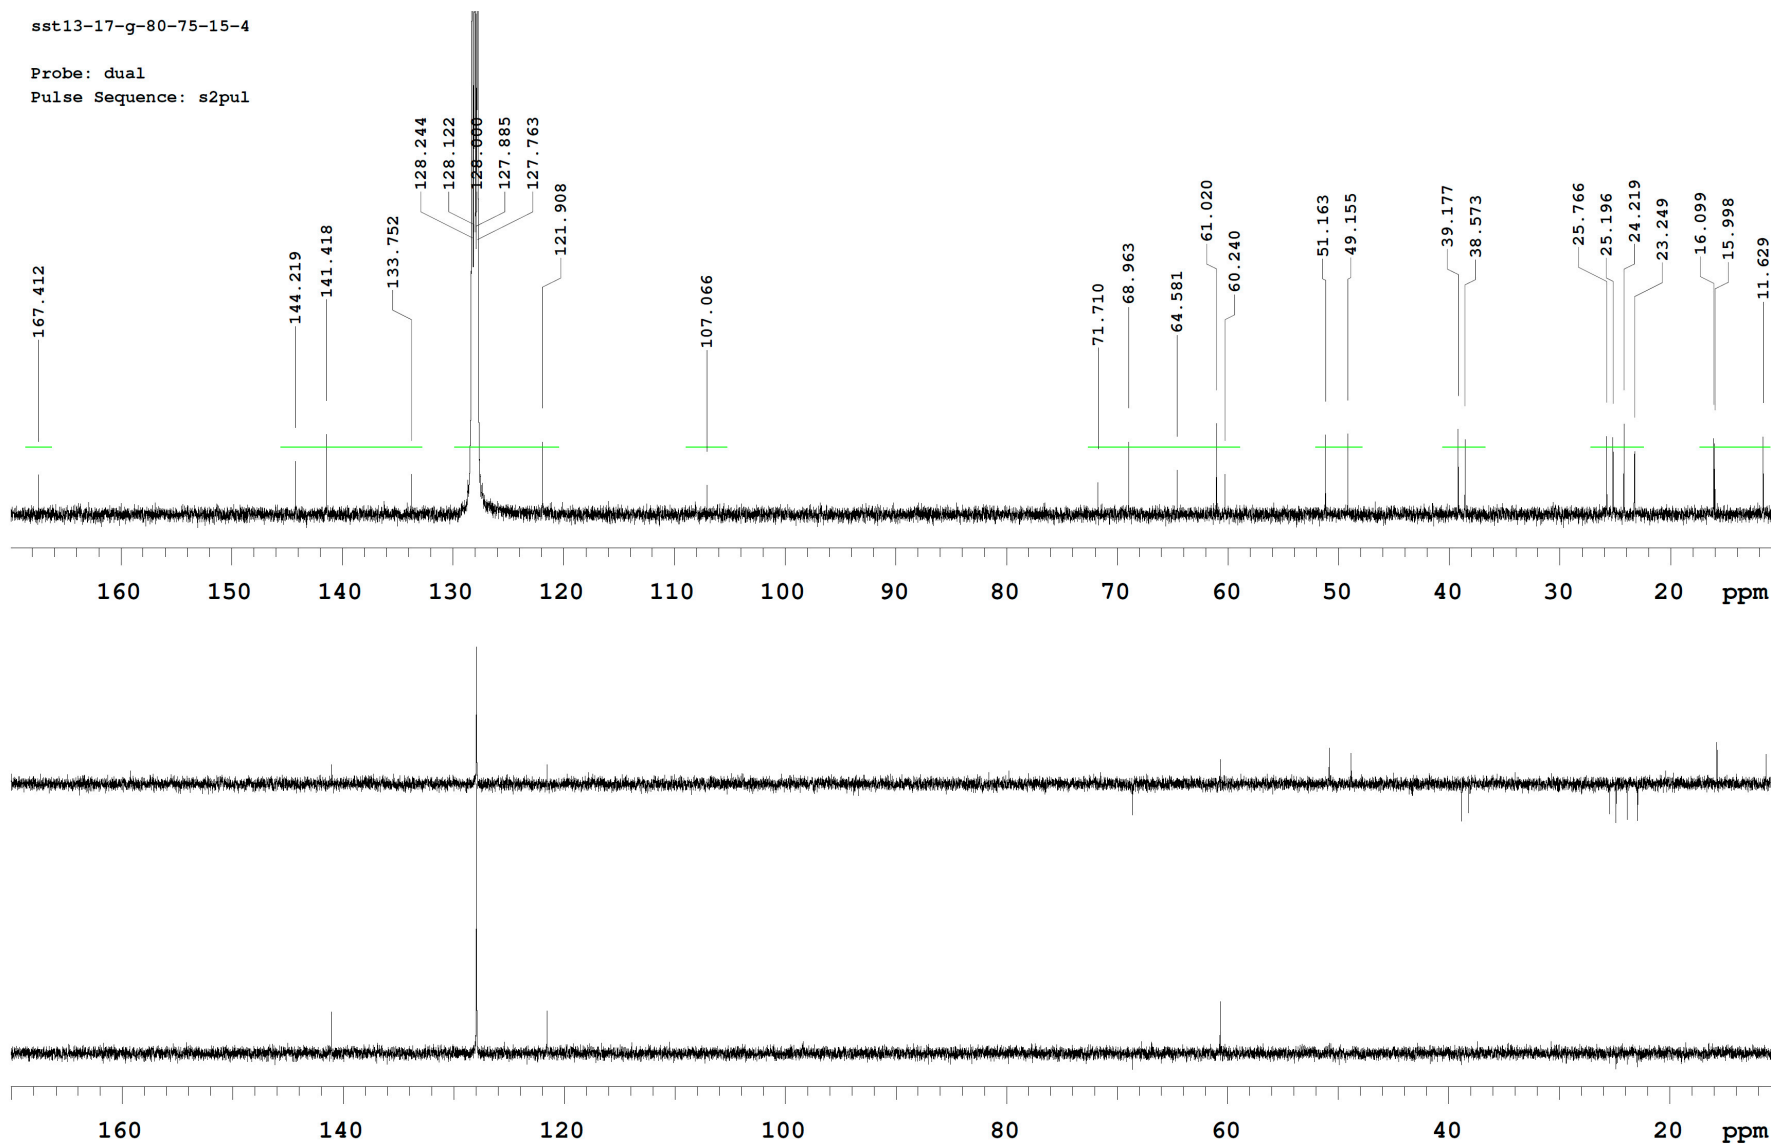

Figure S2. DEPT and  $^{13}\text{C}$  NMR spectrum (100 MHz) of ehrenbergol D (**1**) in  $\text{C}_6\text{D}_6$ .

sst13-17-g-80-75-15-4

Probe: dual

Pulse Sequence: gHSQCAD

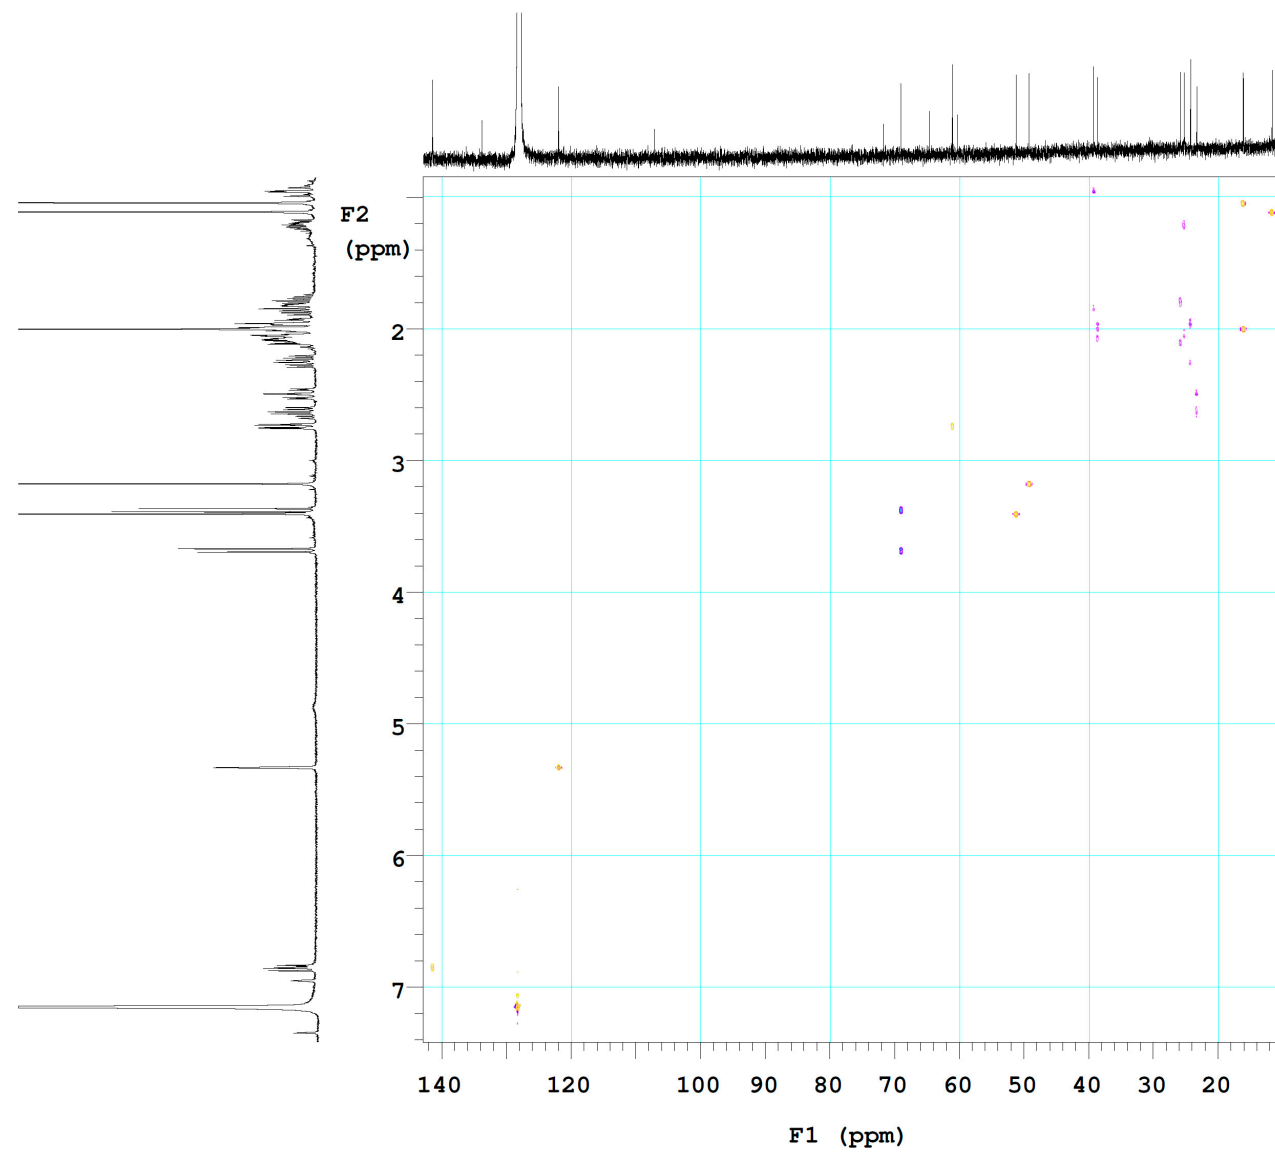

**Figure S3.** HSQC spectrum (100 MHz) of ehrenbergol D (**1**) in  $\text{C}_6\text{D}_6$ .

sst13-17-g-80-75-15-4

Probe: dual

Pulse Sequence: gHMBCAD

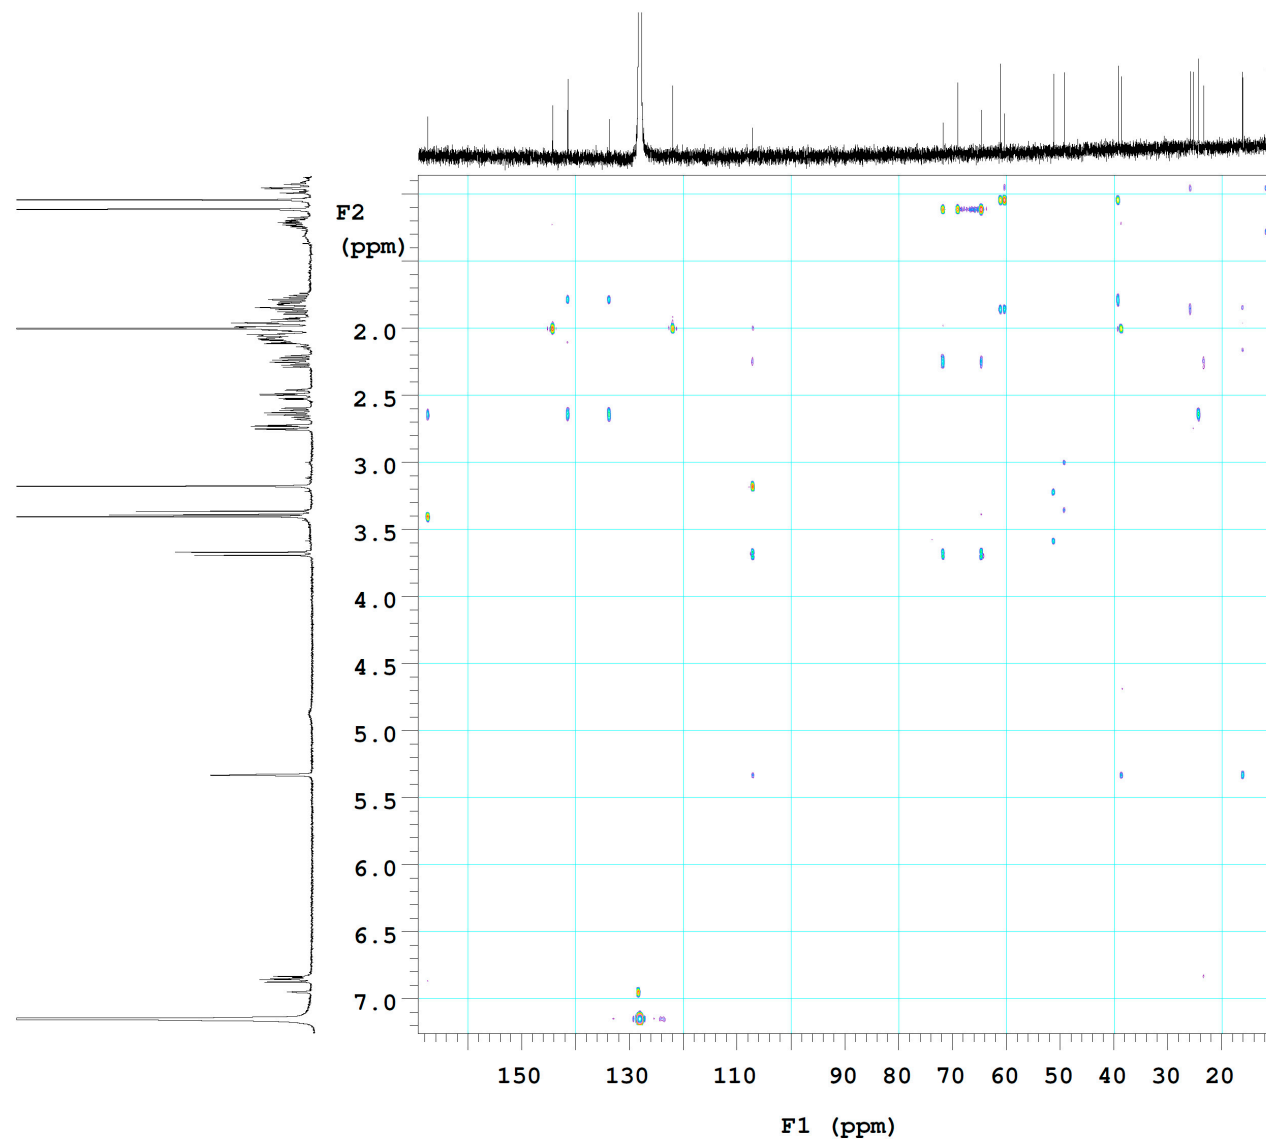

**Figure S4.** HMBC spectrum (400 MHz) of ehrenbergol D (**1**) in C<sub>6</sub>D<sub>6</sub>.

sst13-17-g-80-75-15-4

Probe: dual

Pulse Sequence: gCOSY

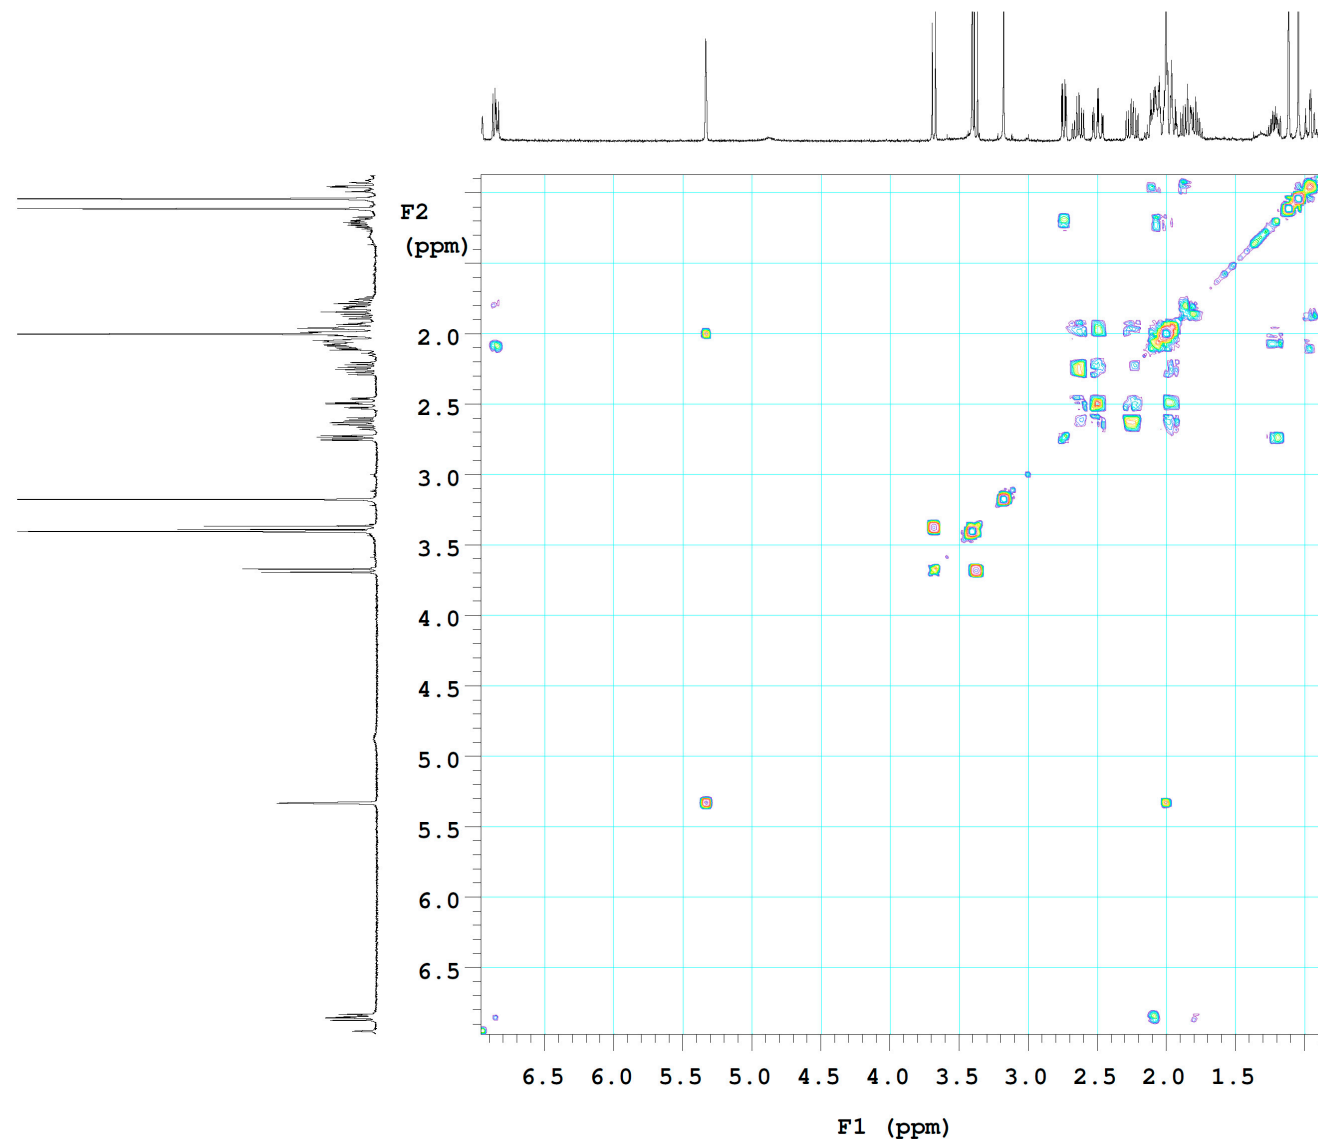

**Figure S5.**  $^1\text{H}$ - $^1\text{H}$  COSY spectrum (400 MHz) of ehrenbergol D (1) in  $\text{C}_6\text{D}_6$ .

sst13-17-g-80-75-15-4

Probe: dual

Pulse Sequence: NOESY

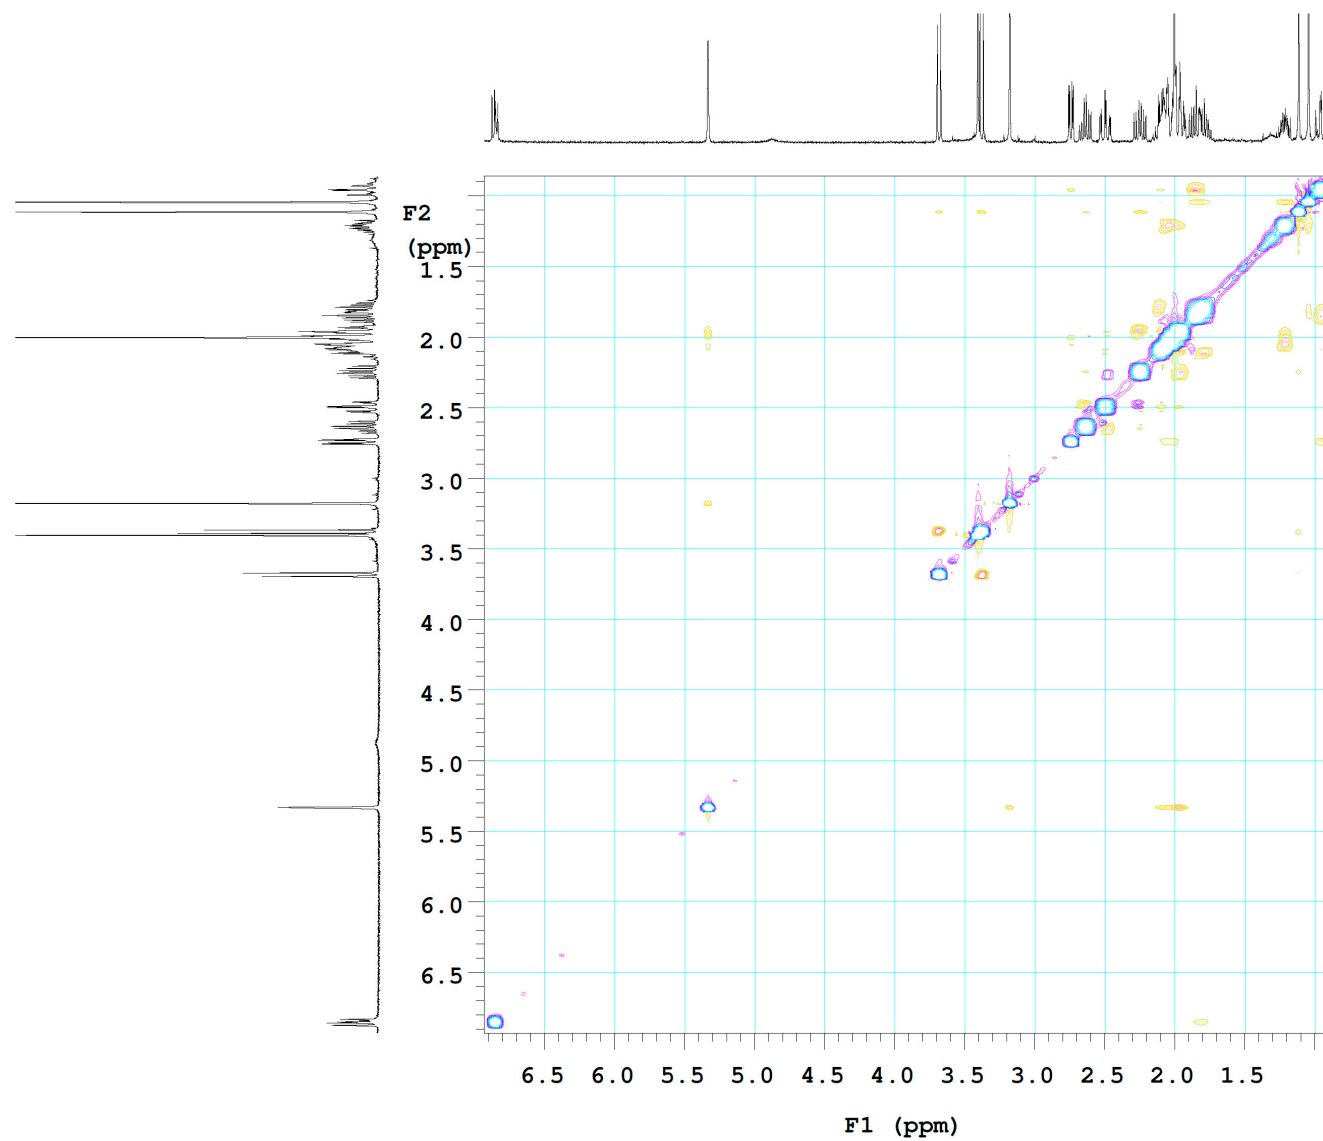

**Figure S6.** NOESY spectrum (400 MHz) of ehrenbergol D (**1**) in C<sub>6</sub>D<sub>6</sub>.

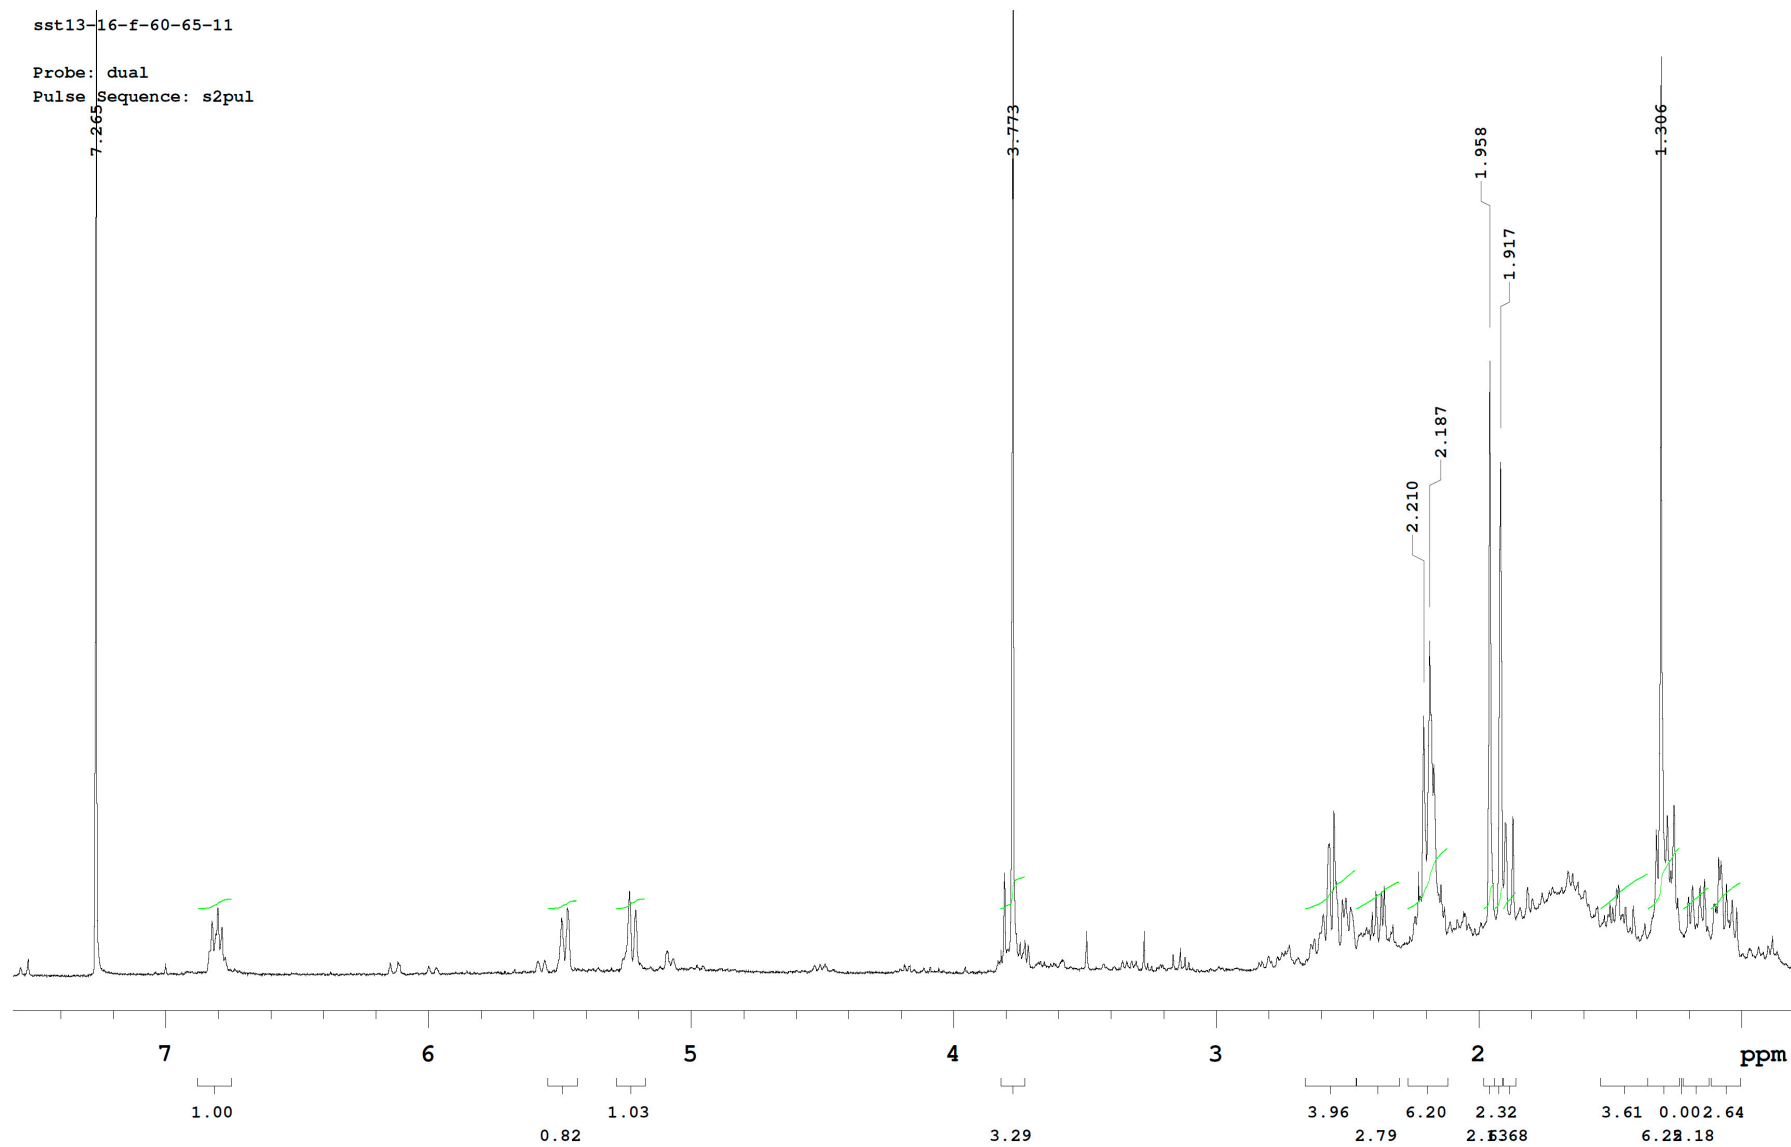

Figure S7.  $^1\text{H}$  NMR spectrum (400 MHz) of ehrenbergol E (**2**) in  $\text{CDCl}_3$ .

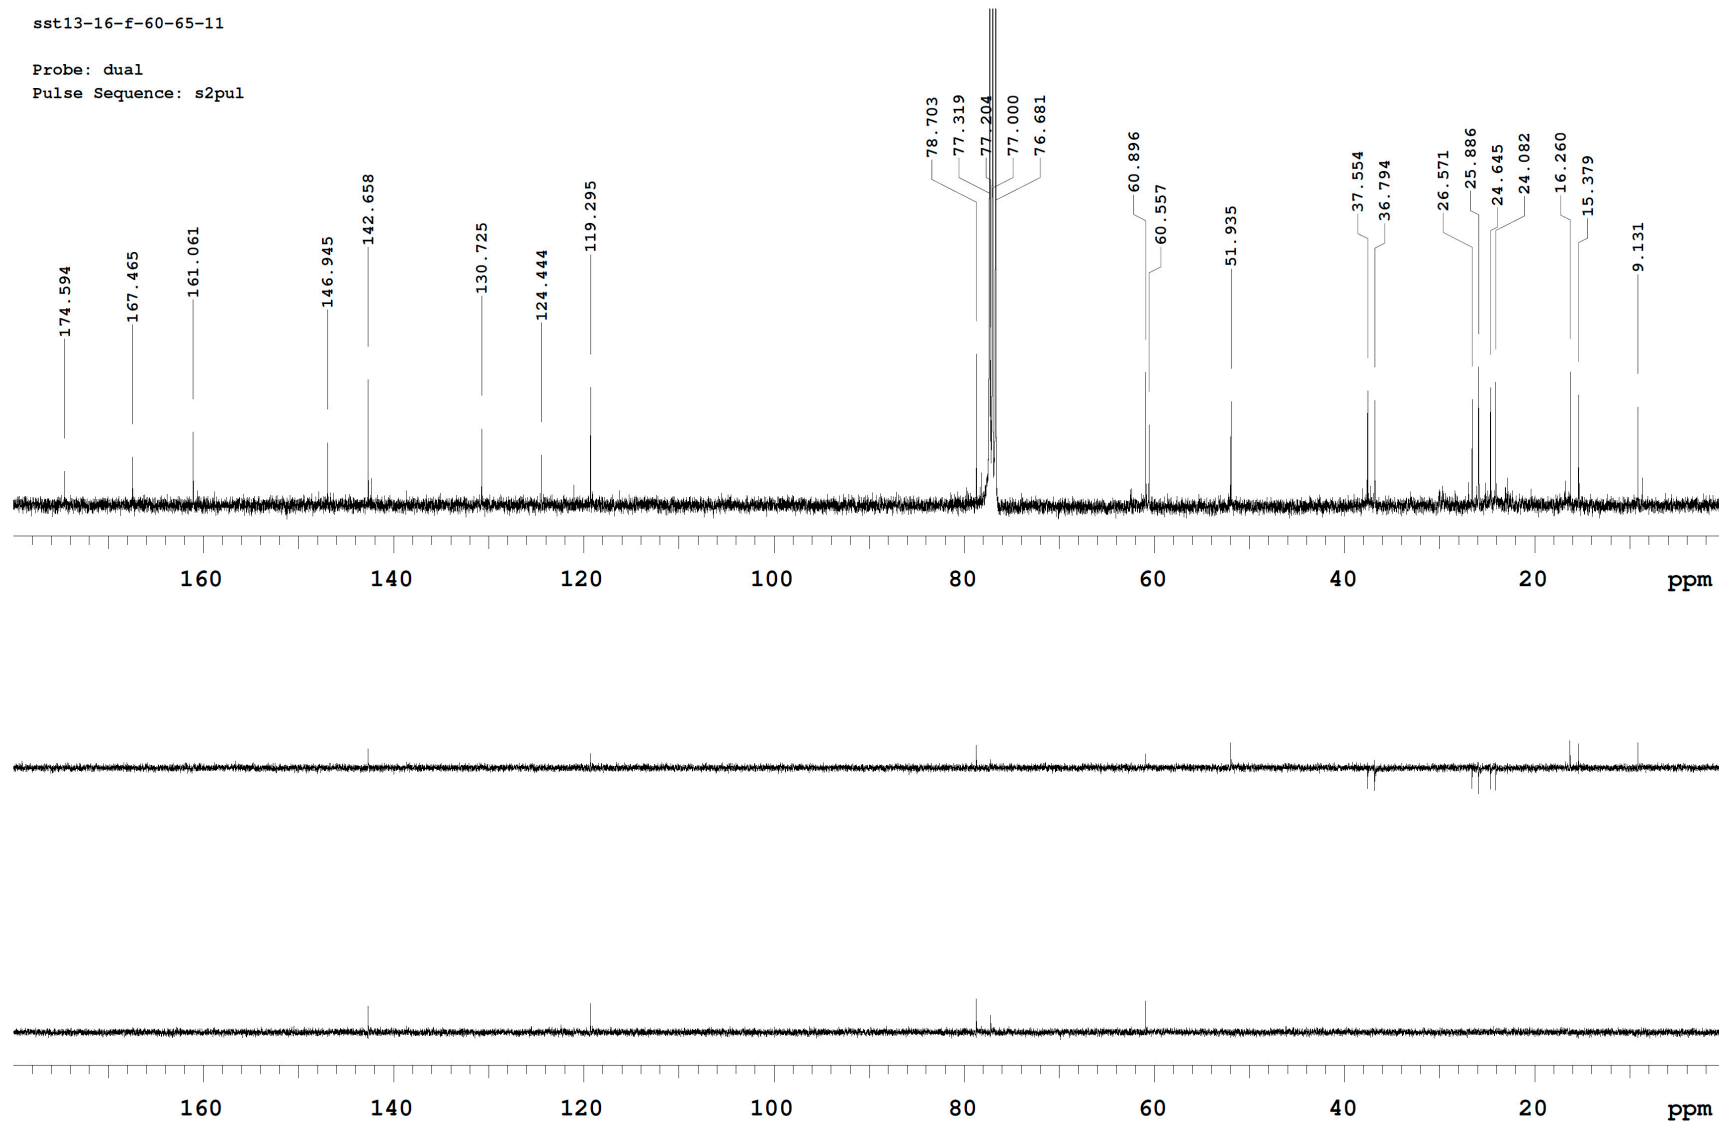

Figure S8. DEPT and  $^{13}\text{C}$  NMR spectrum (100 MHz) of ehrenbergol E (**2**) in  $\text{CDCl}_3$ .



sst13-16-f-60-65-11

Probe: dual

Pulse Sequence: gHSQCAD

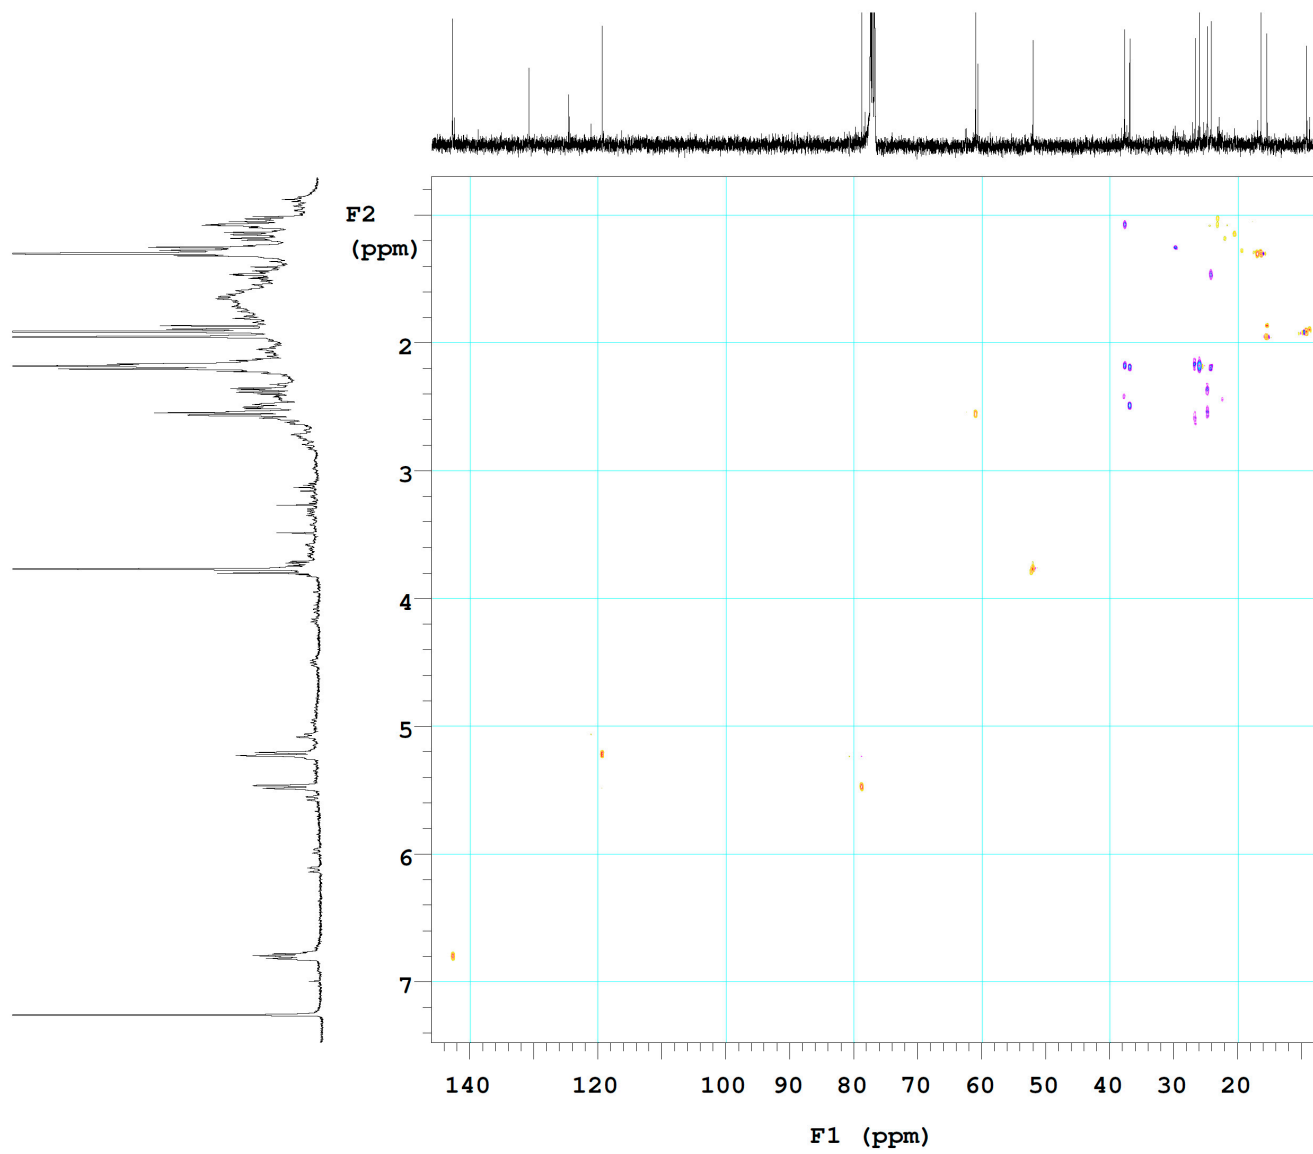

**Figure S9.** HSQC spectrum (400 MHz) of ehrenbergol E (**2**) in  $\text{CDCl}_3$ .

sst13-16-f-60-65-11

Probe: dual

Pulse Sequence: gHMBCAD

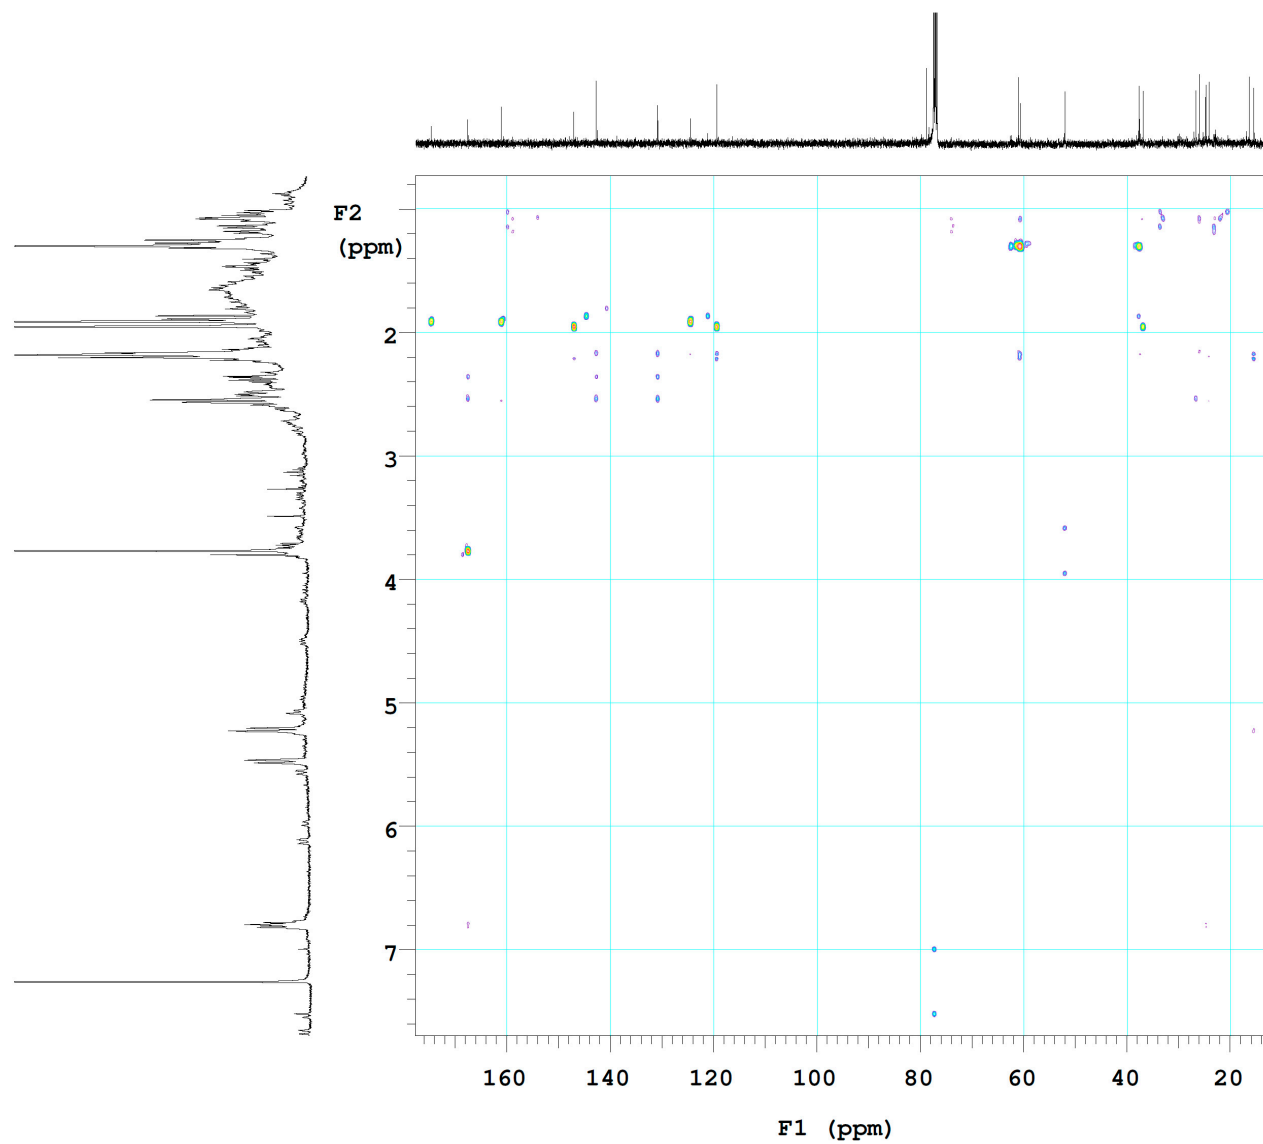

Figure S10. HMBC spectrum (400 MHz) of ehrenbergol E (**2**) in CDCl<sub>3</sub>.

sst13-16-f-60-65-11

Probe: dual

Pulse Sequence: gCOSY

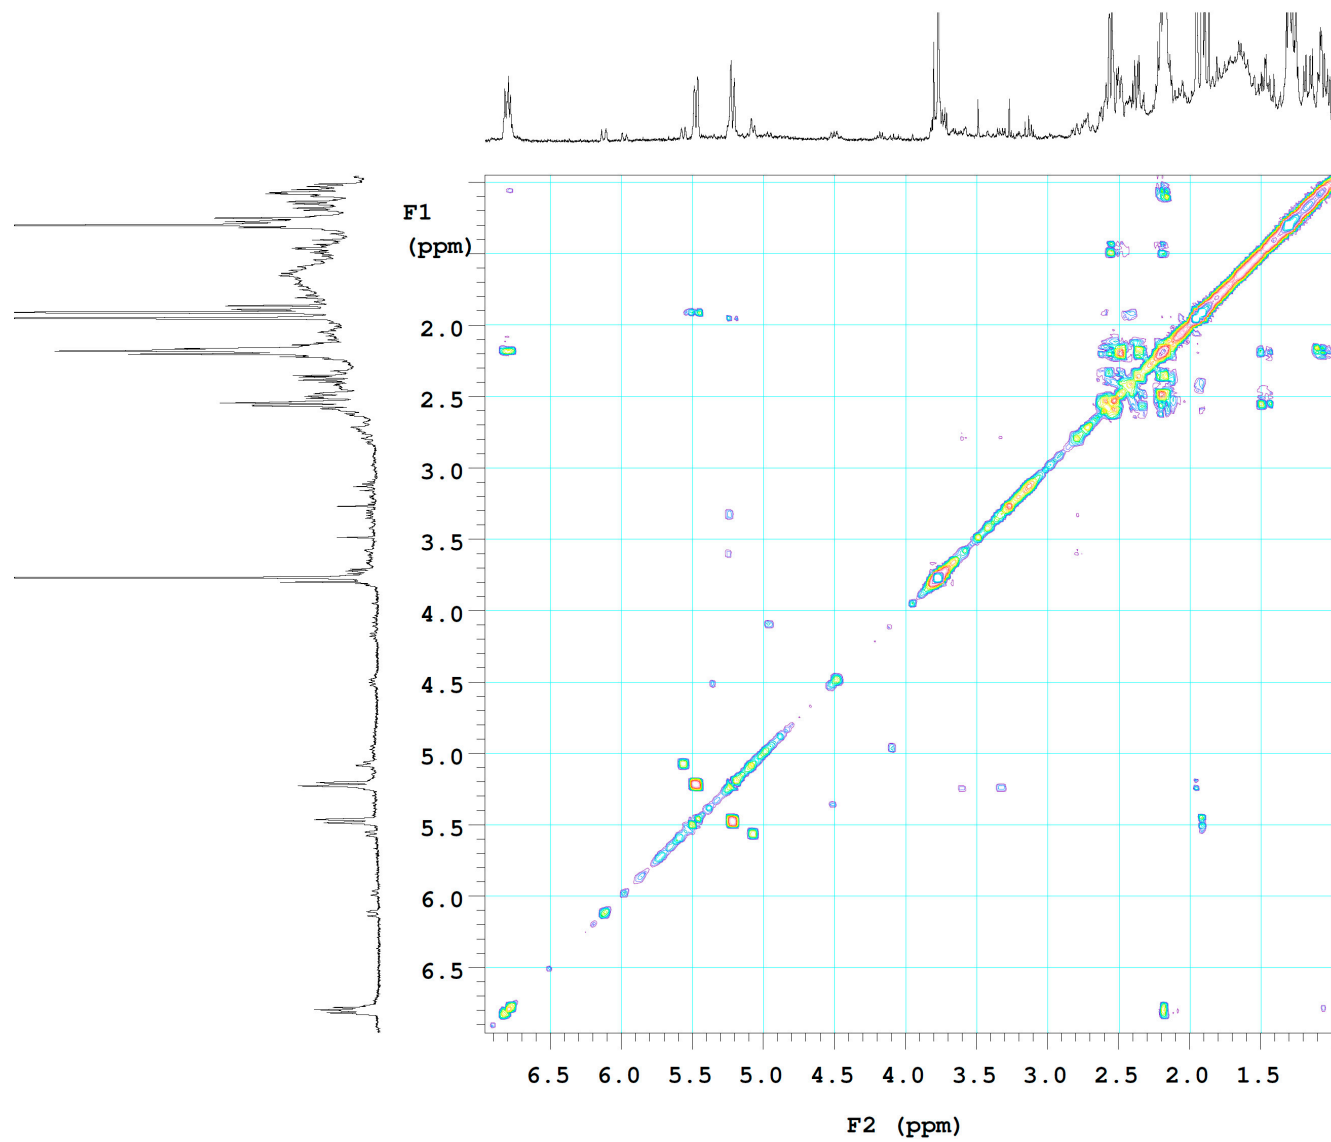

**Figure S11.**  $^1\text{H}$ - $^1\text{H}$  COSY spectrum (400 MHz) of ehrenbergol E (2) in  $\text{CDCl}_3$ .

sst13-16-f-60-65-11  
Probe: dual  
Pulse Sequence: NOESY

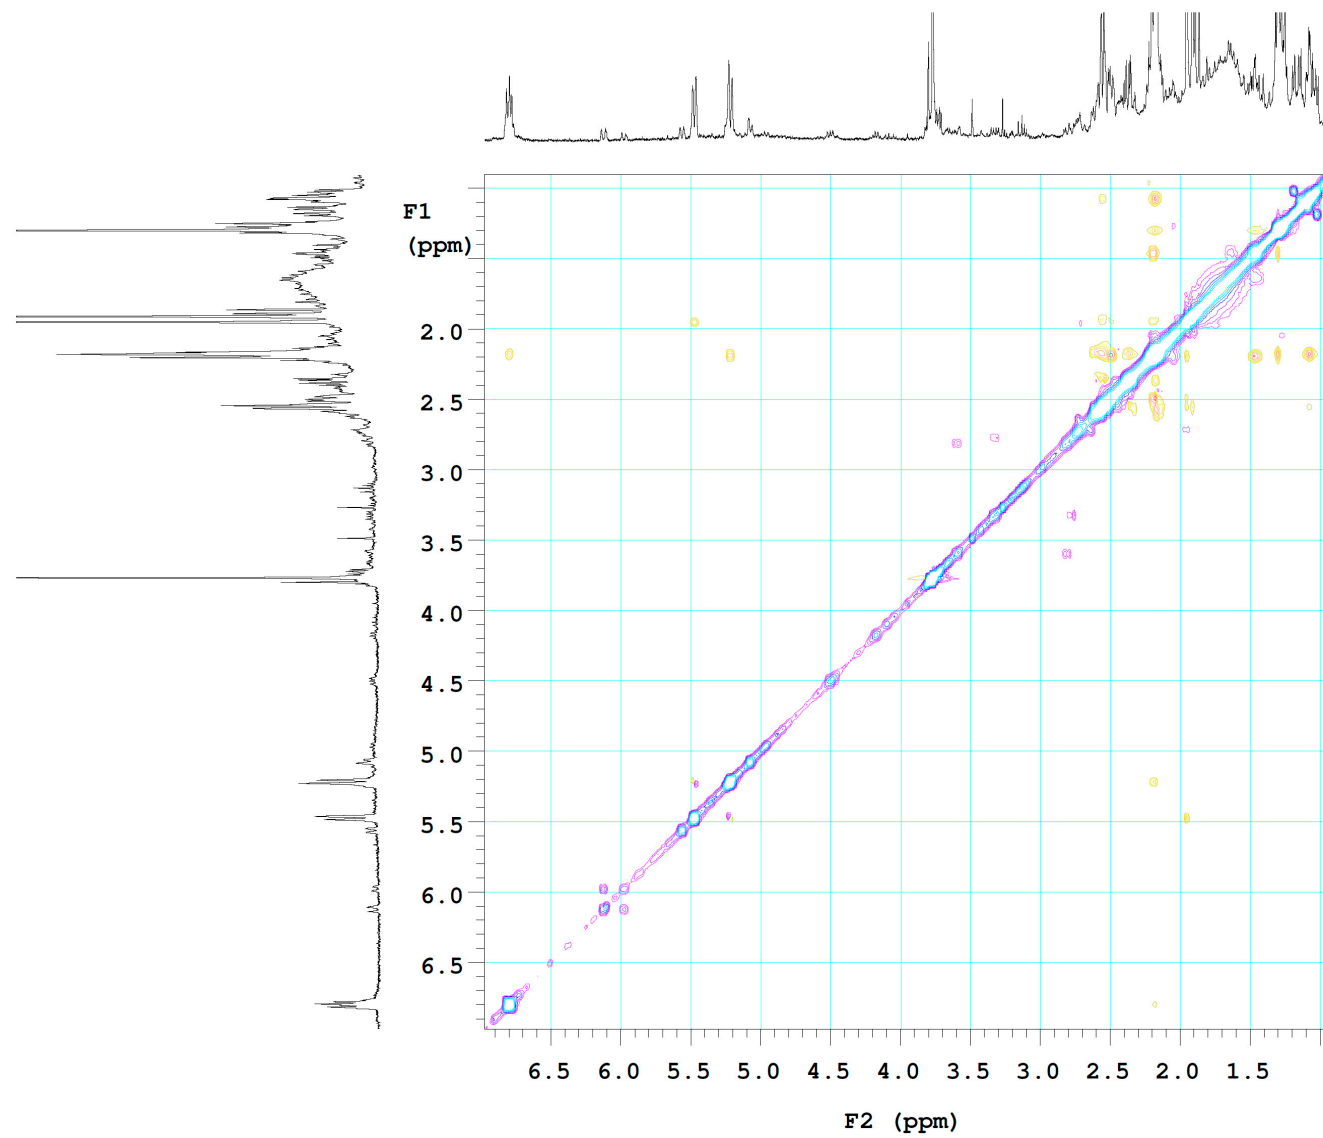

**Figure S12.** NOESY spectrum (400 MHz) of ehrenbergol E (2) in CDCl<sub>3</sub>.

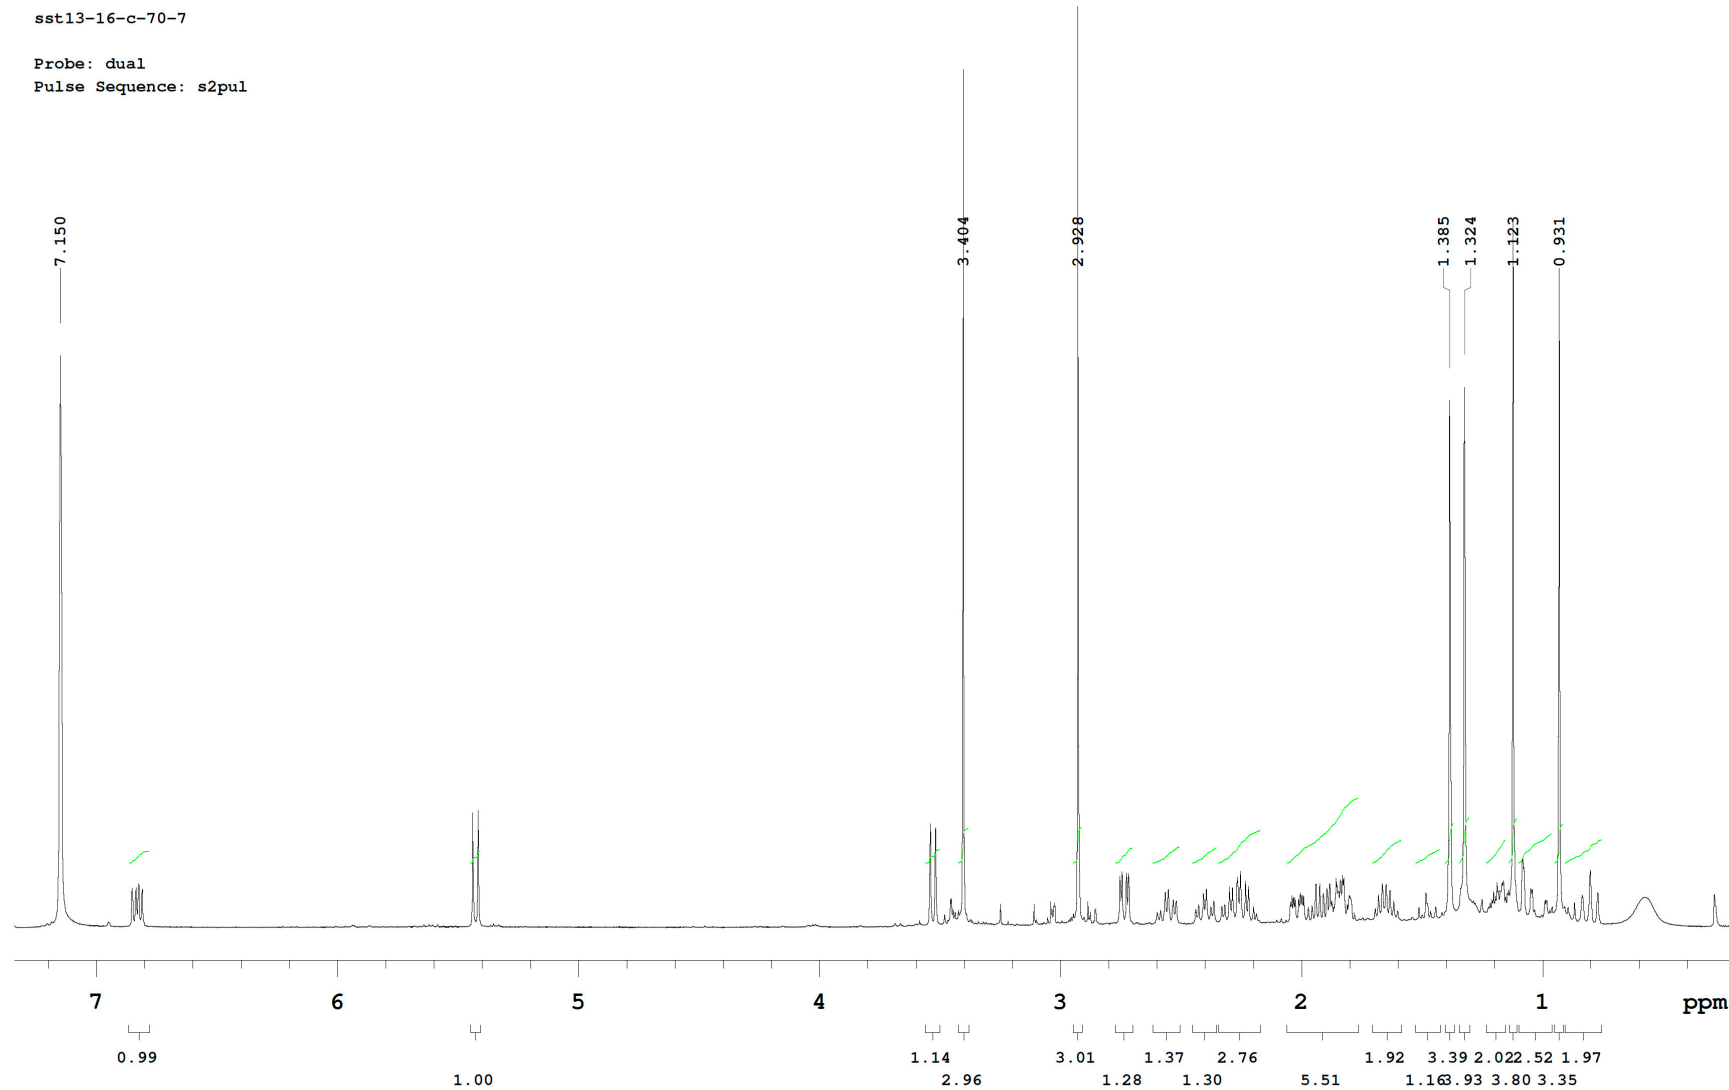

**Figure S13.**  $^1\text{H}$  NMR spectrum (400 MHz) of ehrenbergol F (**3**) in  $\text{C}_6\text{D}_6$ .

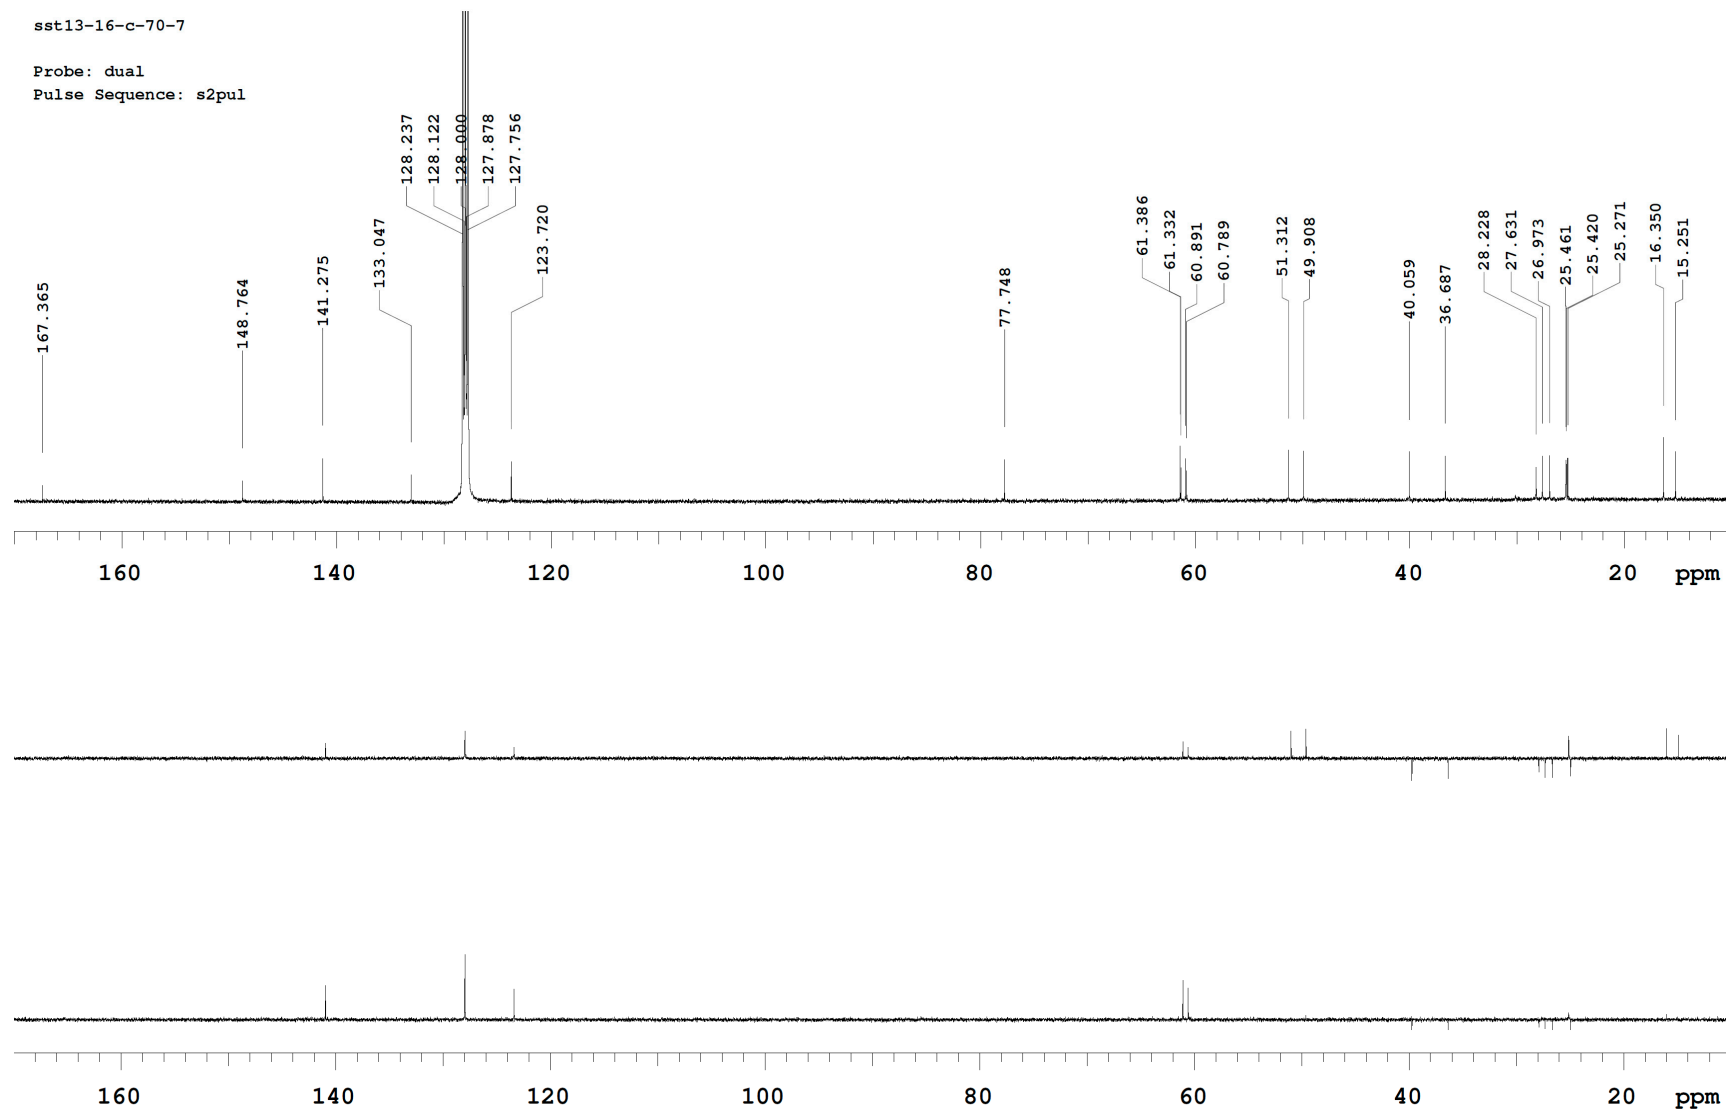

Figure S14. DEPT and  $^{13}\text{C}$  NMR spectrum (100 MHz) of ehrenbergol F (**3**) in  $\text{C}_6\text{D}_6$ .

sst13-16-c-70-7

Probe: dual

Pulse Sequence: gHSQCAD

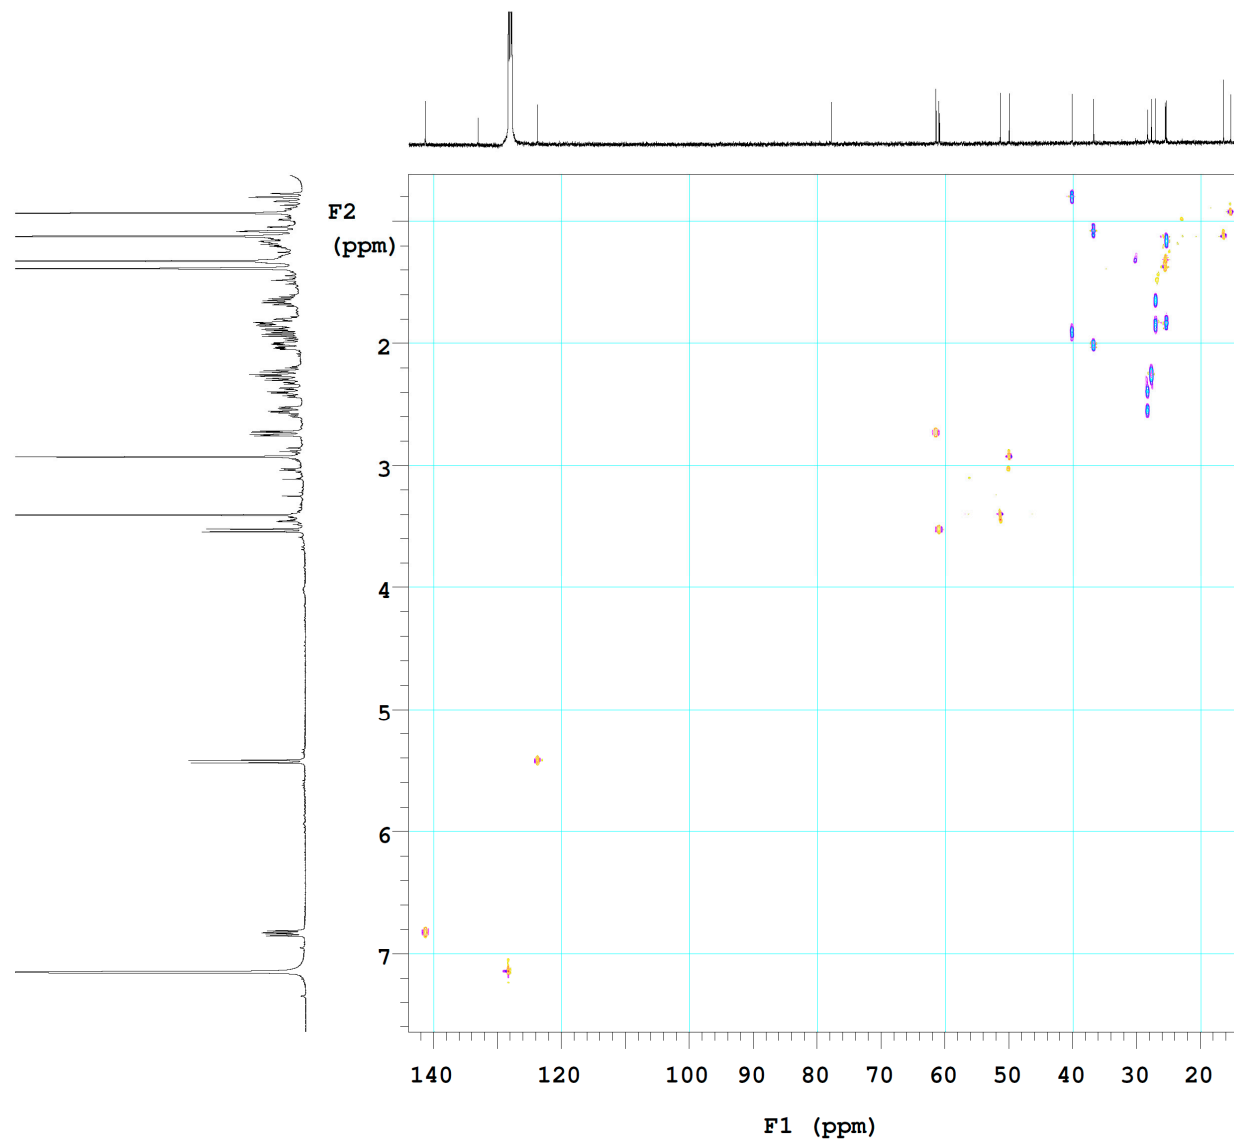

Figure S15. HSQC spectrum (400 MHz) of ehrenbergol F (**3**) in  $\text{C}_6\text{D}_6$ .

sst13-16-c-70-7

Probe: dual

Pulse Sequence: gHMBCAD

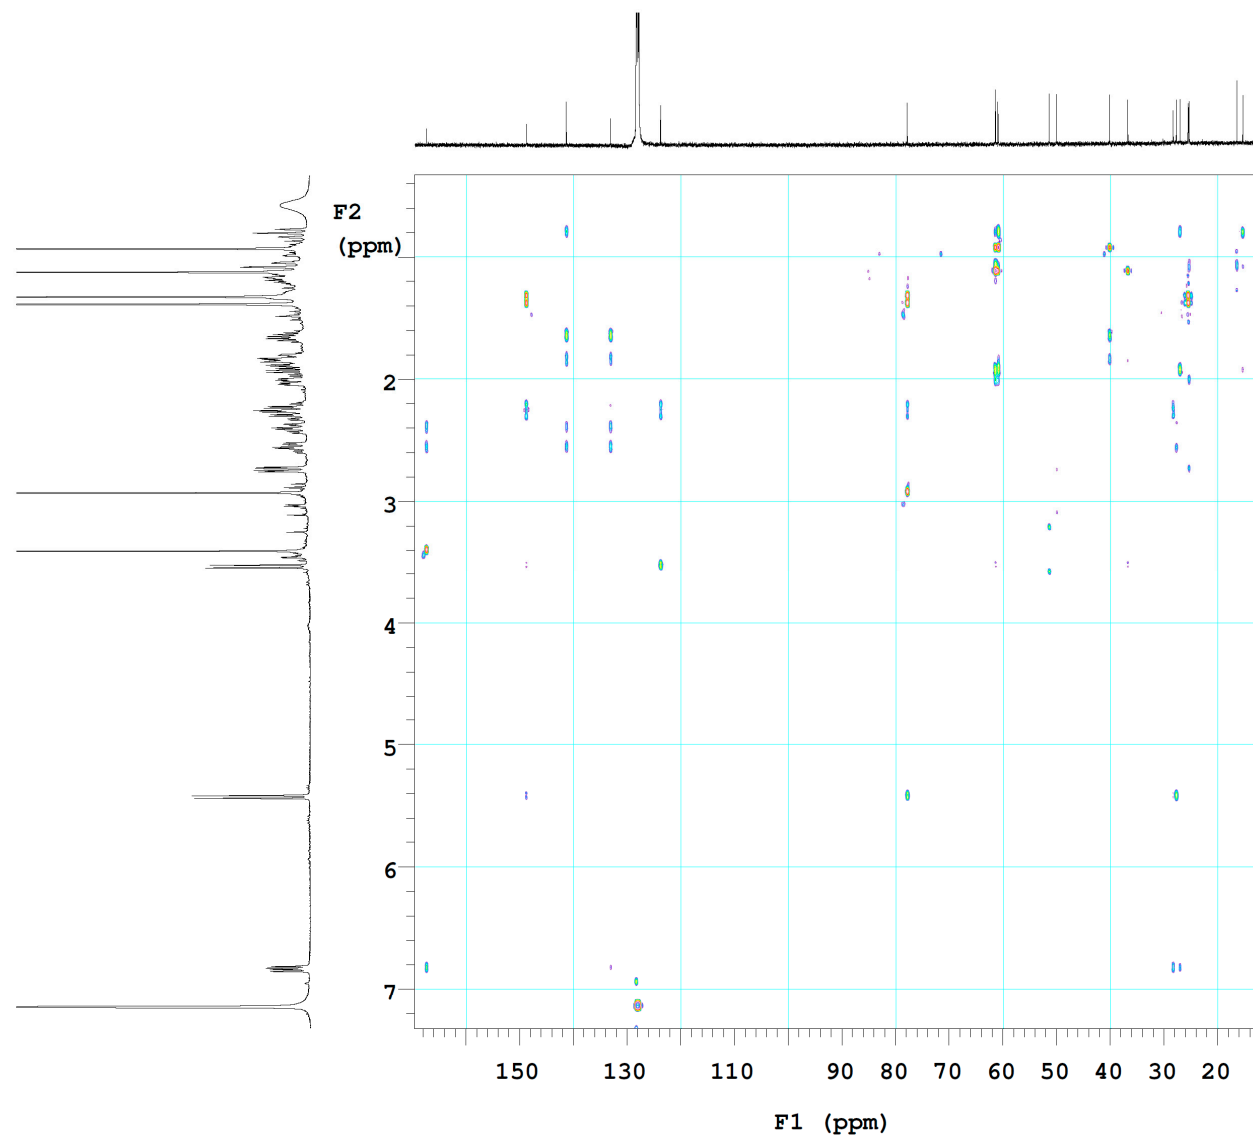

**Figure S16.** HMBC spectrum (400 MHz) of ehrenbergol F (3) in  $C_6D_6$ .



sst13-16-c-70-7

Probe: dual

Pulse Sequence: gCOSY

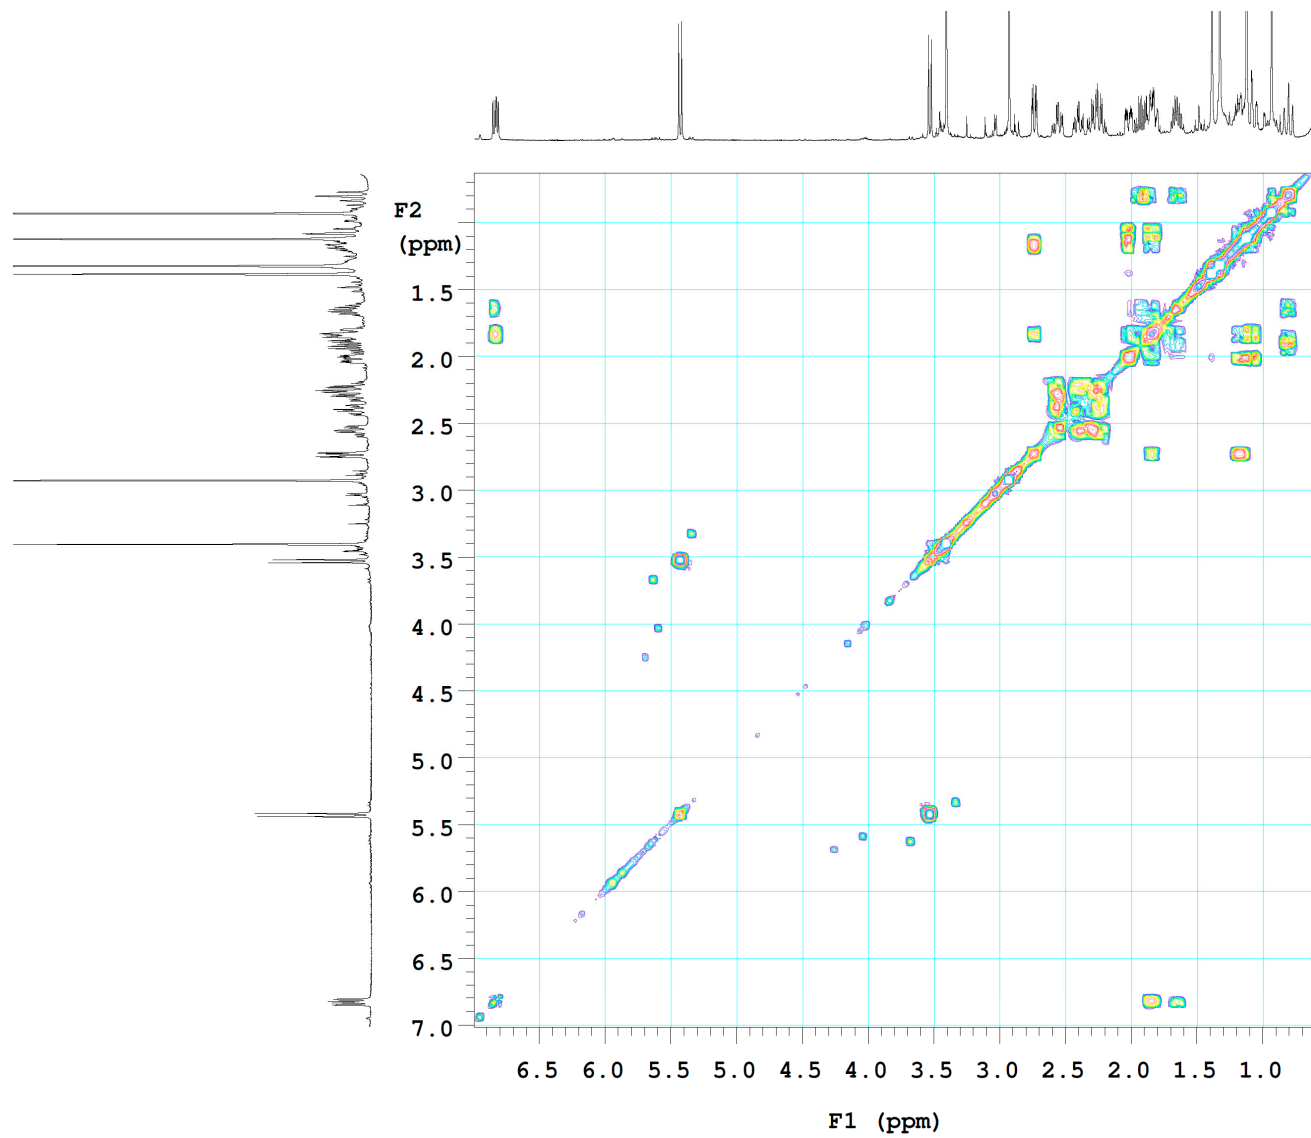

**Figure S17.**  $^1\text{H}$ - $^1\text{H}$  COSY spectrum (400 MHz) of ehrenbergol F (**3**) in  $\text{C}_6\text{D}_6$ .

sst13-16-c-70-7

Probe: dual

Pulse Sequence: NOESY

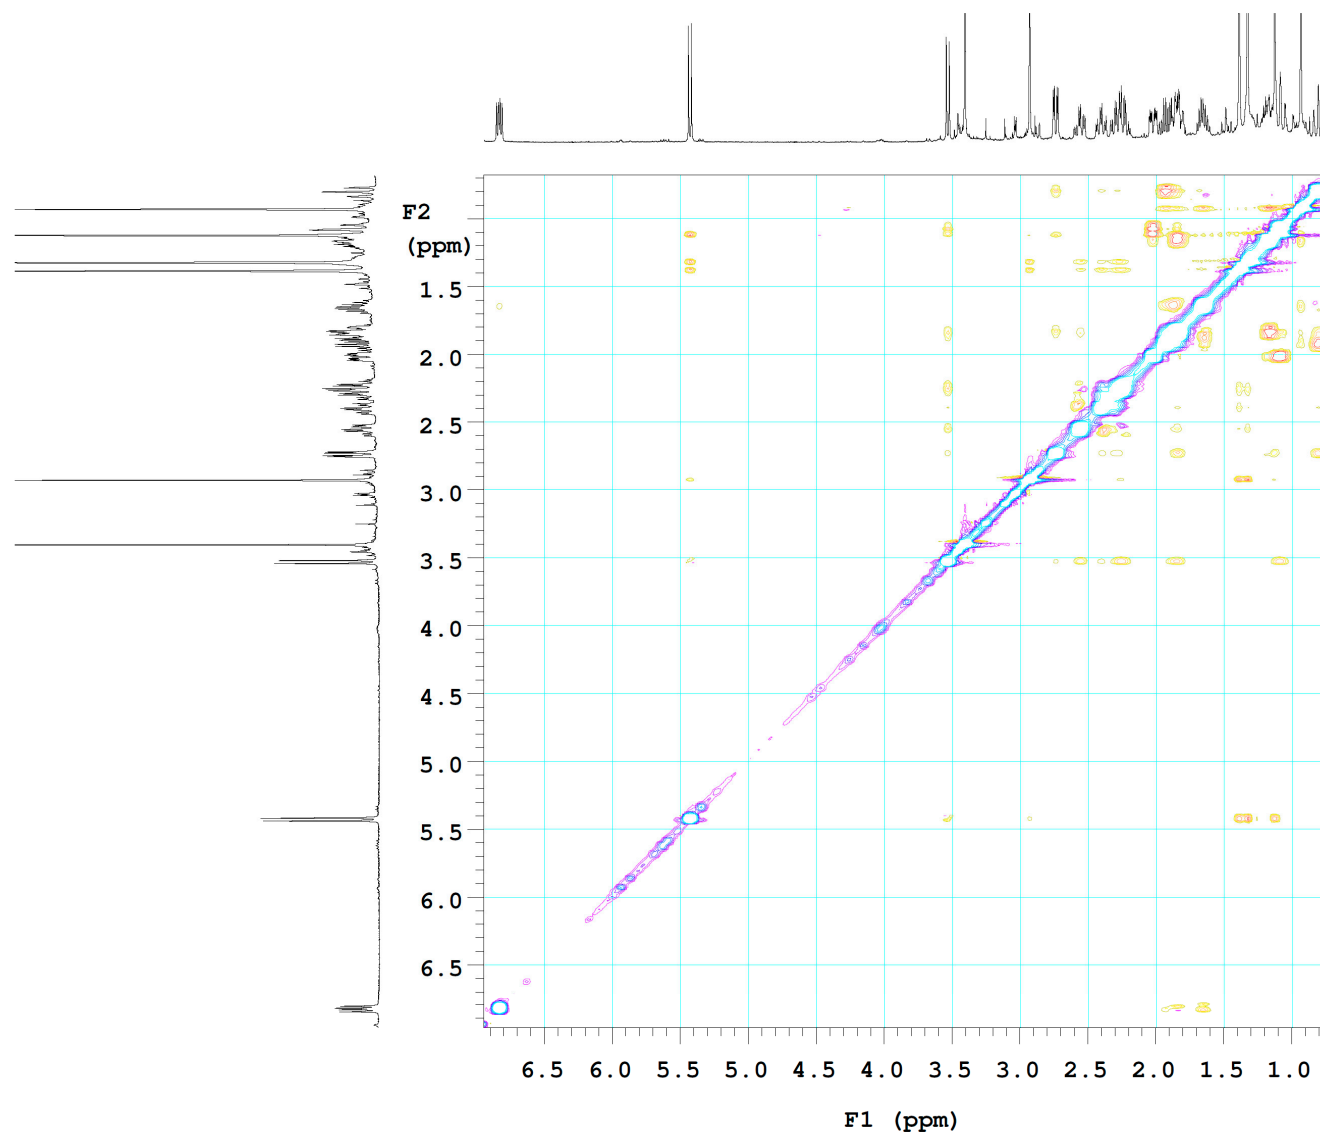

**Figure S18.** NOESY spectrum (400 MHz) of ehrenbergol F (3) in C<sub>6</sub>D<sub>6</sub>.

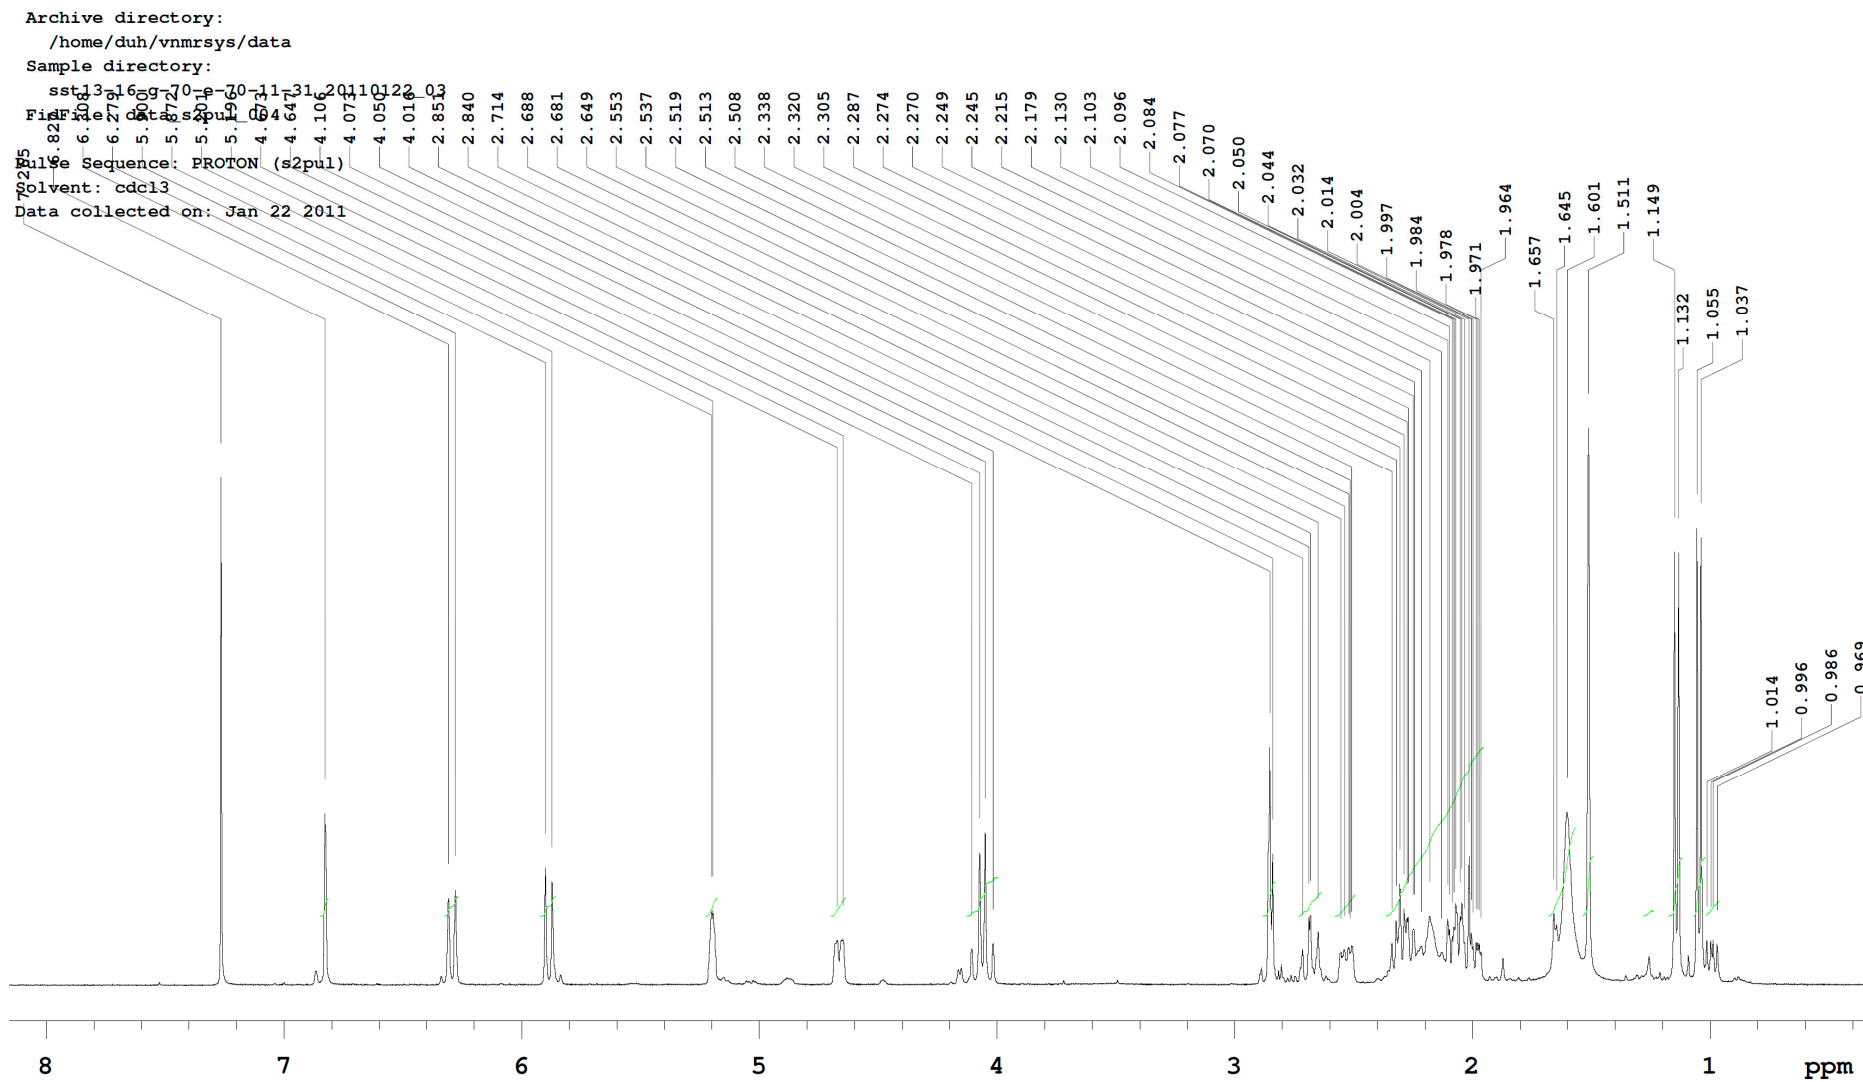

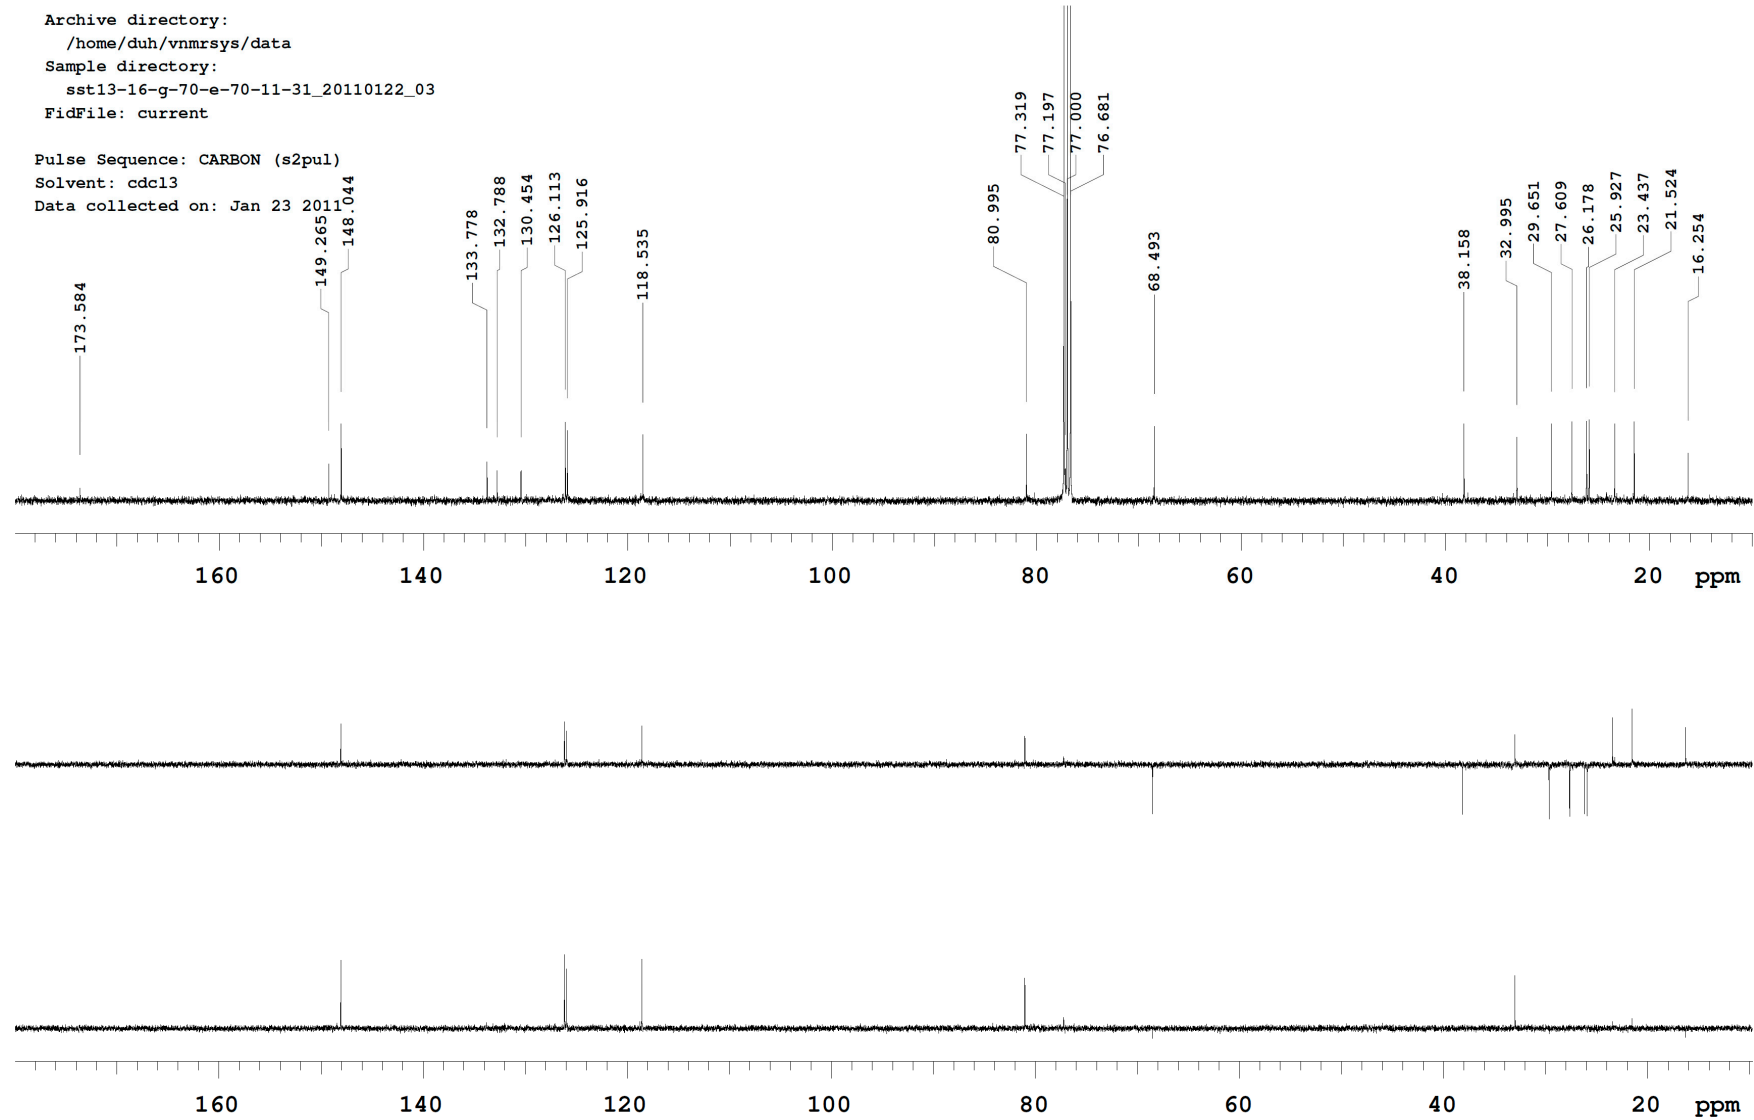

Figure S20. DEPT and  $^{13}\text{C}$  NMR spectrum (100 MHz) of ehrenbergol G (**4**) in  $\text{C}_6\text{D}_6$ .



Archive directory:  
/home/duh/vnmrsys/data  
Sample directory:  
sst13-16-g-70-e-70-11-31\_20110122\_03  
FidFile: data\_gHMBCAD\_001

Pulse Sequence: gHMBCAD  
Solvent: cdc13  
Data collected on: Jan 23 2011

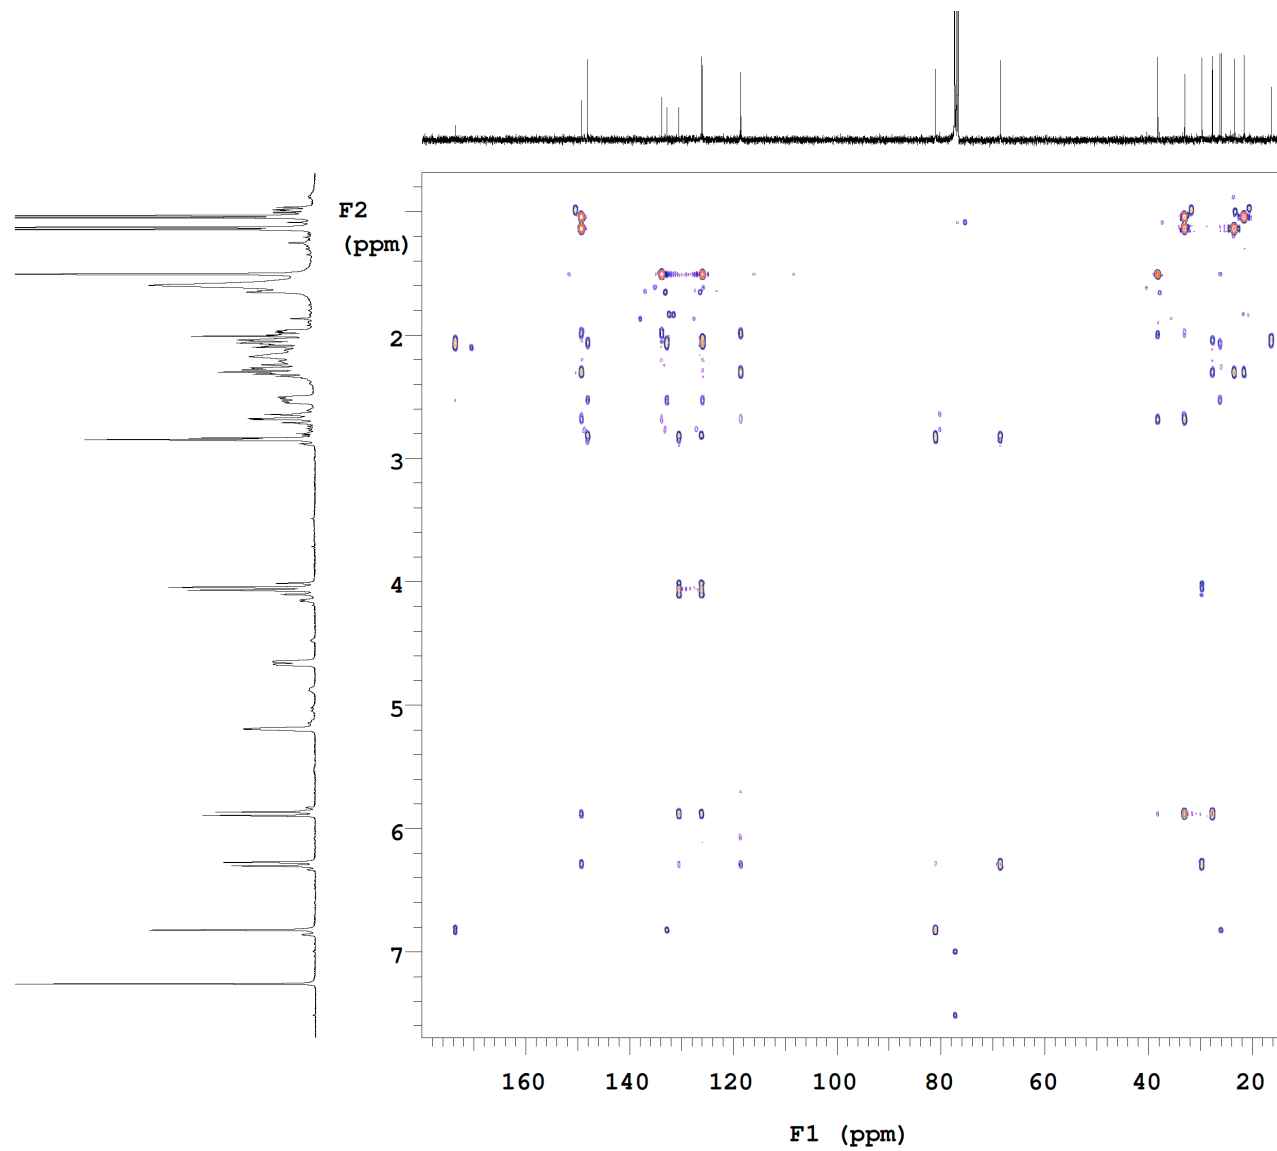

**Figure S22.** HMBC spectrum (400 MHz) of ehrenbergol G (4) in  $\text{C}_6\text{D}_6$ .

Archive directory:  
/home/duh/vnmrsys/data  
Sample directory:  
sst13-16-g-70-e-70-11-31\_20110122\_03  
FidFile: data\_gCOSY\_001

Pulse Sequence: gCOSY  
Solvent: cdc13  
Data collected on: Jan 22 2011

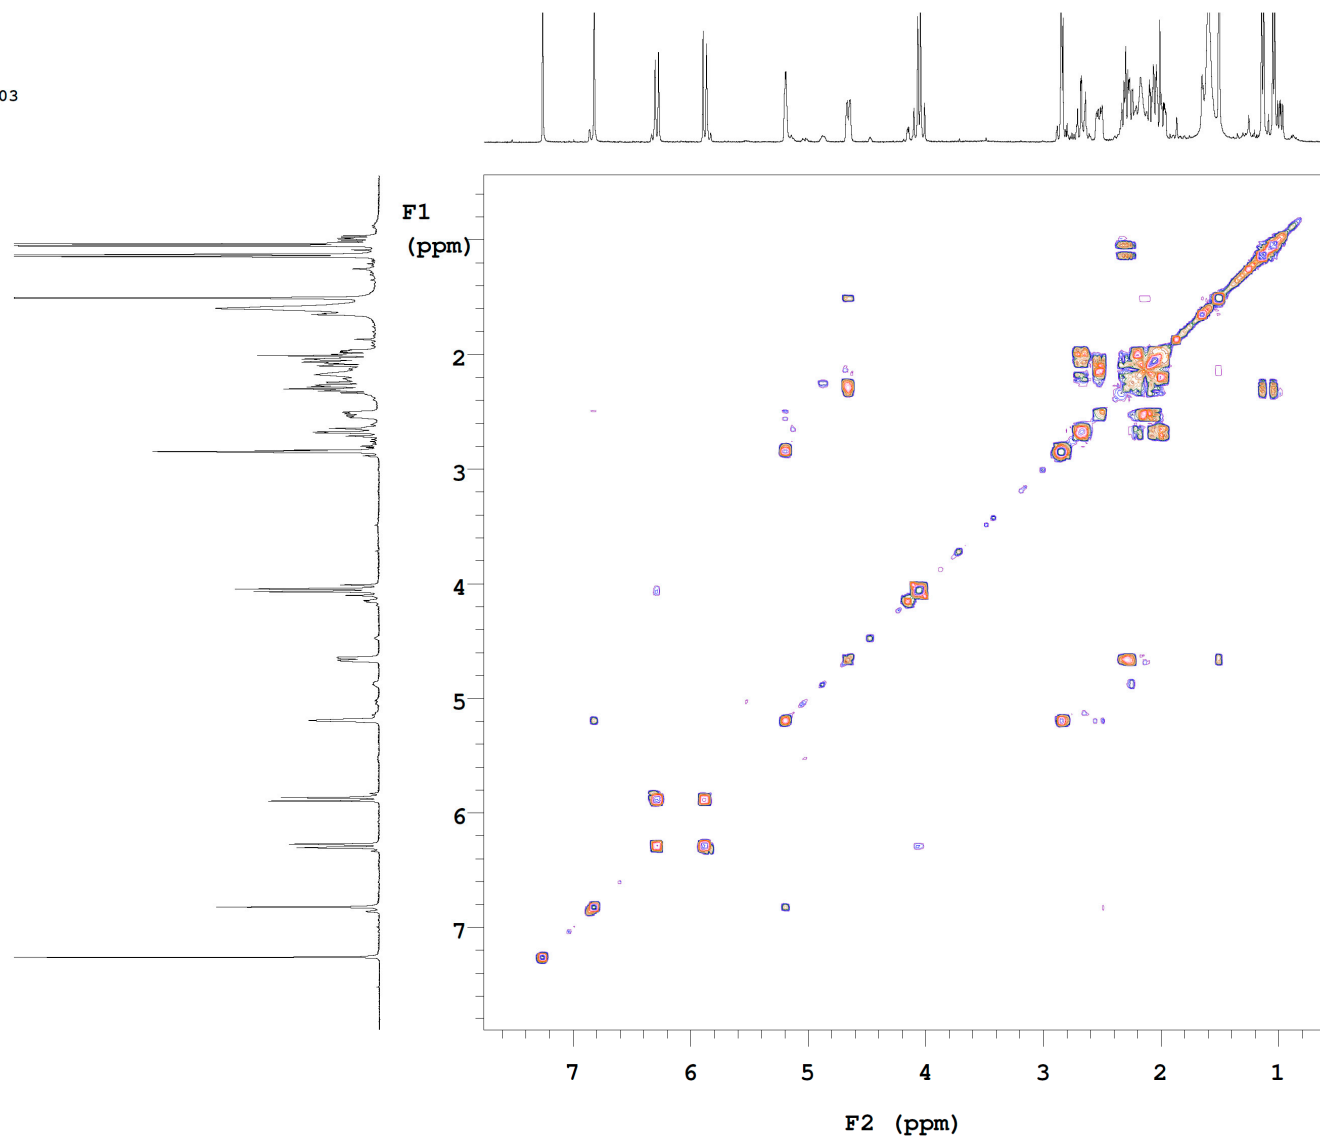

**Figure S23.**  $^1\text{H}$ - $^1\text{H}$  COSY spectrum (400 MHz) of ehrenbergol G (4) in  $\text{C}_6\text{D}_6$ .

Archive directory:  
/home/duh/vnmrsys/data  
Sample directory:  
sst13-16-g-70-e-70-11-31\_20110122\_03  
FidFile: data\_NOESY\_001

Pulse Sequence: NOESY  
Solvent: cdcl3  
Data collected on: Jan 22 2011

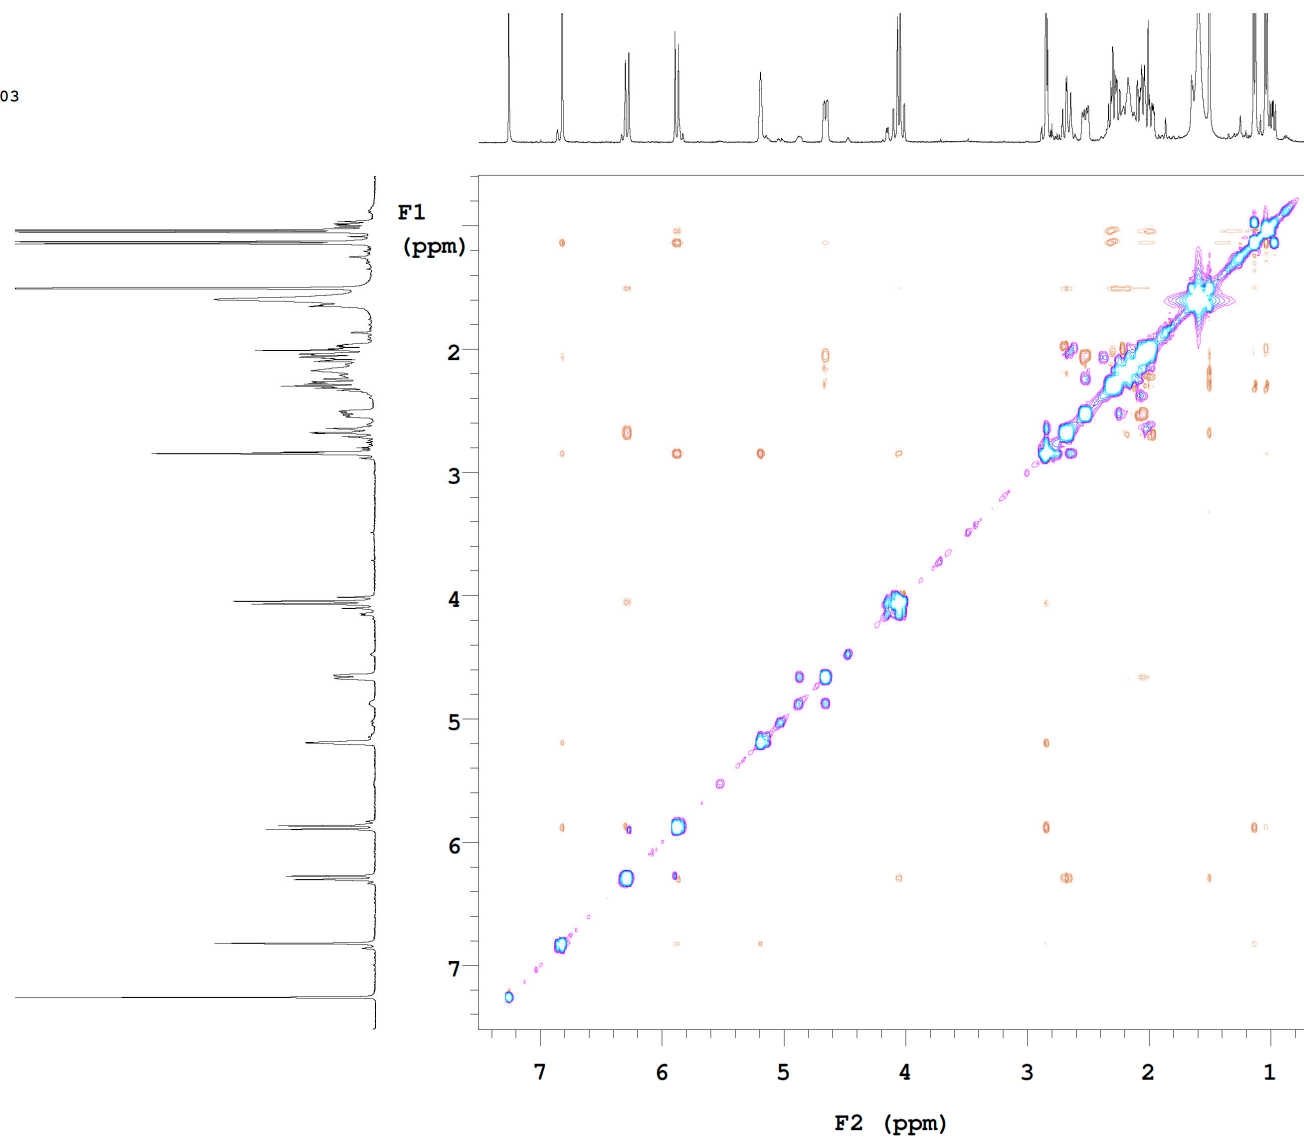

**Figure S24.** NOESY spectrum (400 MHz) of ehrenbergol G (**4**) in C<sub>6</sub>D<sub>6</sub>.



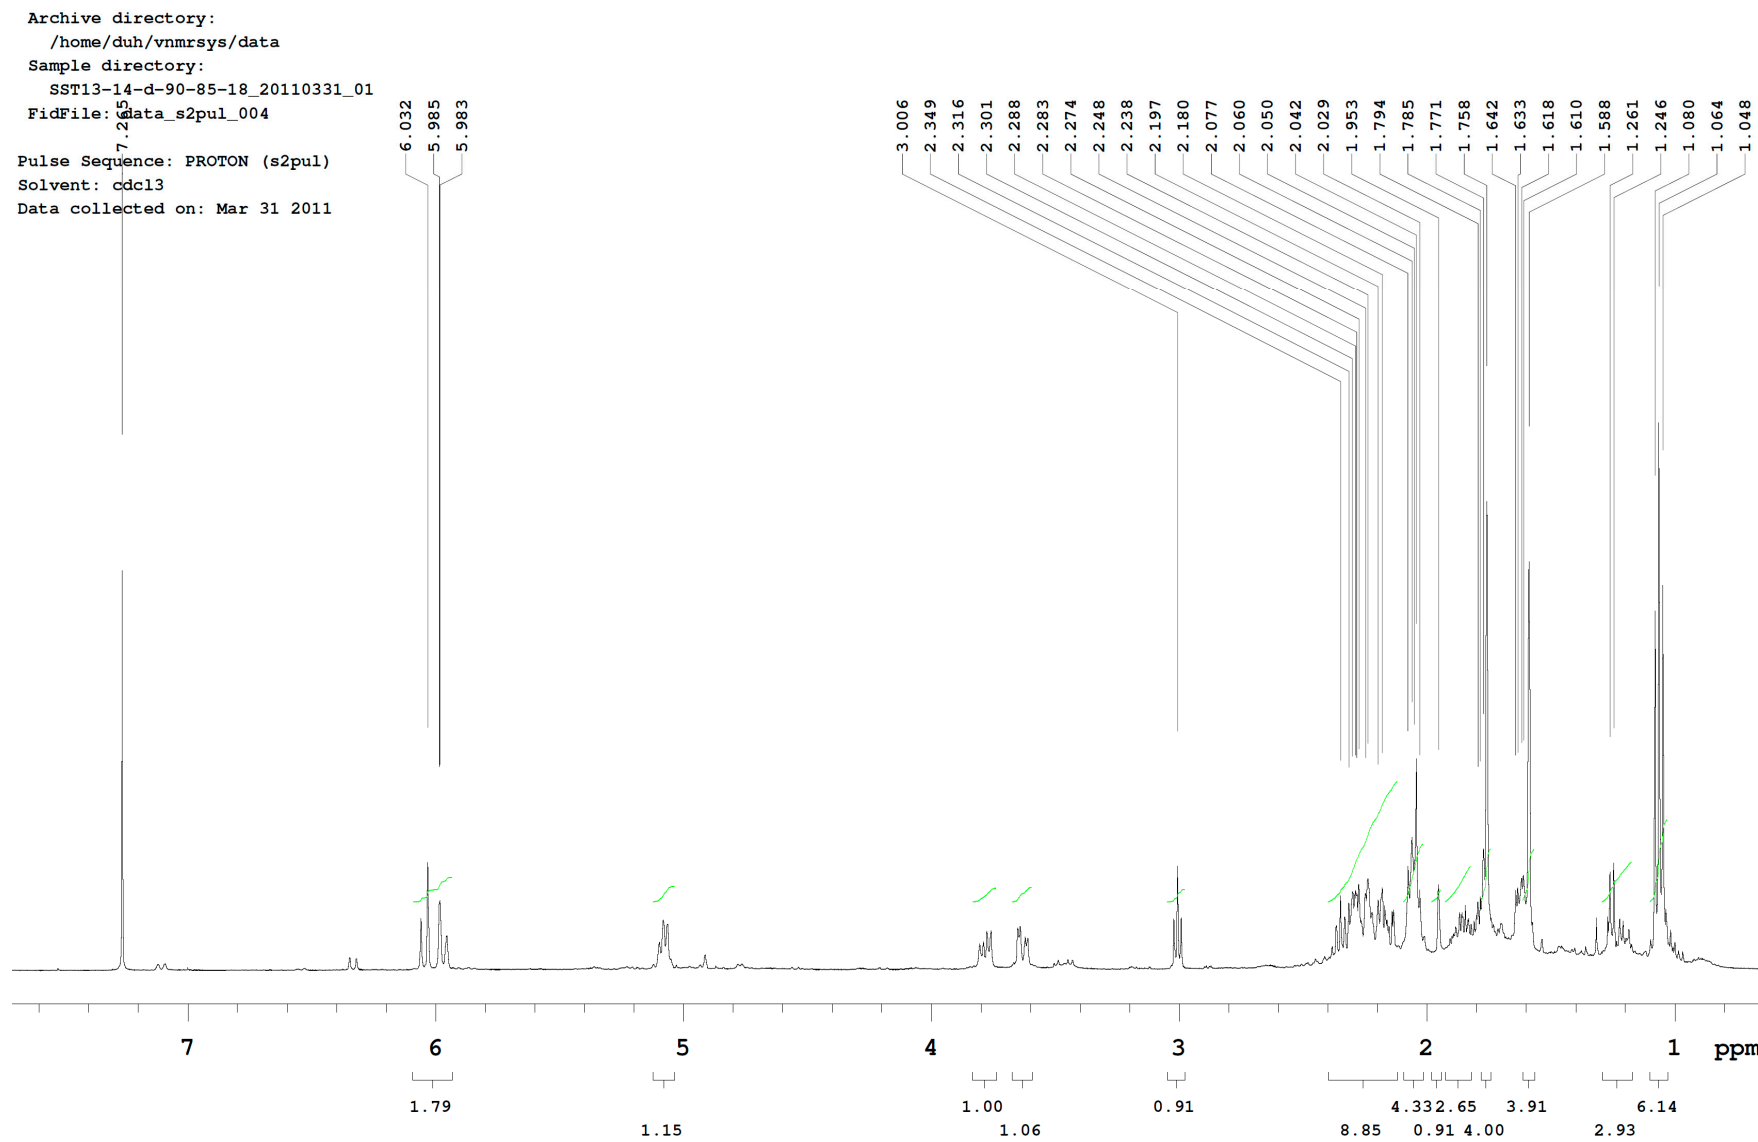

Figure S25.  $^1\text{H}$  NMR spectrum (400 MHz) of ehrenbergol H (5) in  $\text{CDCl}_3$ .



Archive directory:  
/home/duh/vnmrsys/data  
Sample directory:  
SST13-14-d-90-85-18\_20110331\_01  
FidFile: data\_gHSQCAD\_001

Pulse Sequence: gHSQCAD  
Solvent: cdc13  
Data collected on: Mar 31 2011

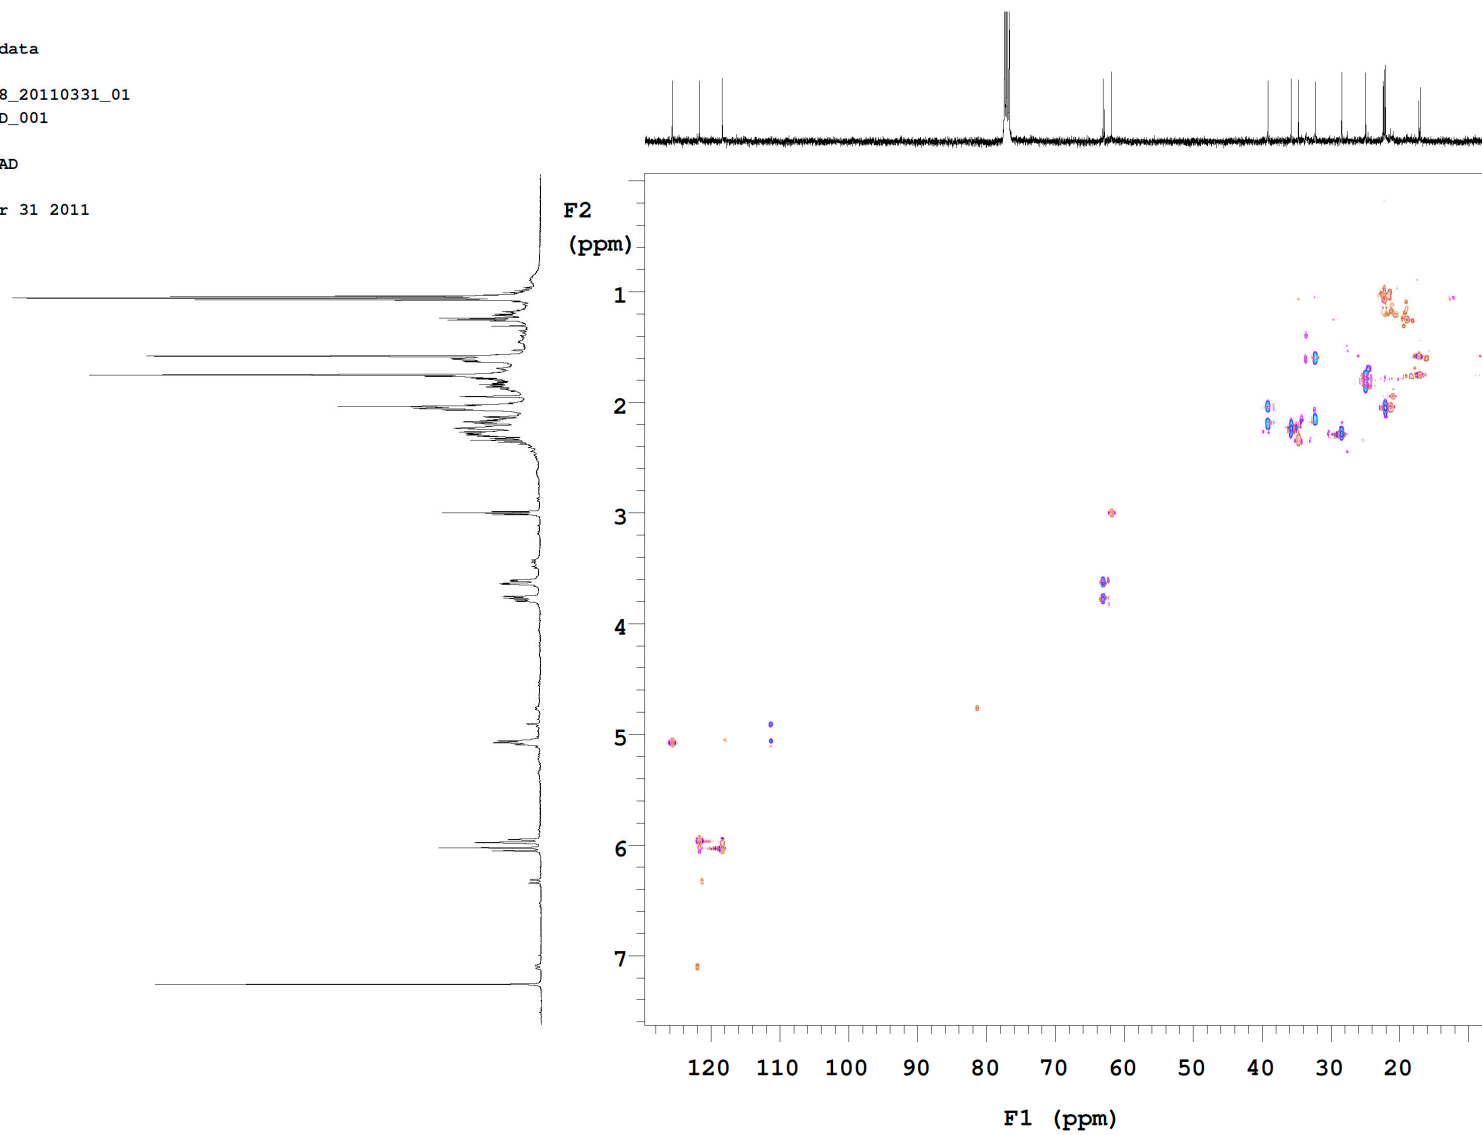

**Figure S27.** HSQC spectrum (400 MHz) of ehrenbergol H (5) in  $\text{CDCl}_3$ .

Archive directory:  
/home/duh/vnmrsys/data  
Sample directory:  
SST13-14-d-90-85-18\_20110331\_01  
FidFile: data\_gHMBCAD\_001

Pulse Sequence: gHMBCAD  
Solvent: cdcl3  
Data collected on: Apr 1 2011

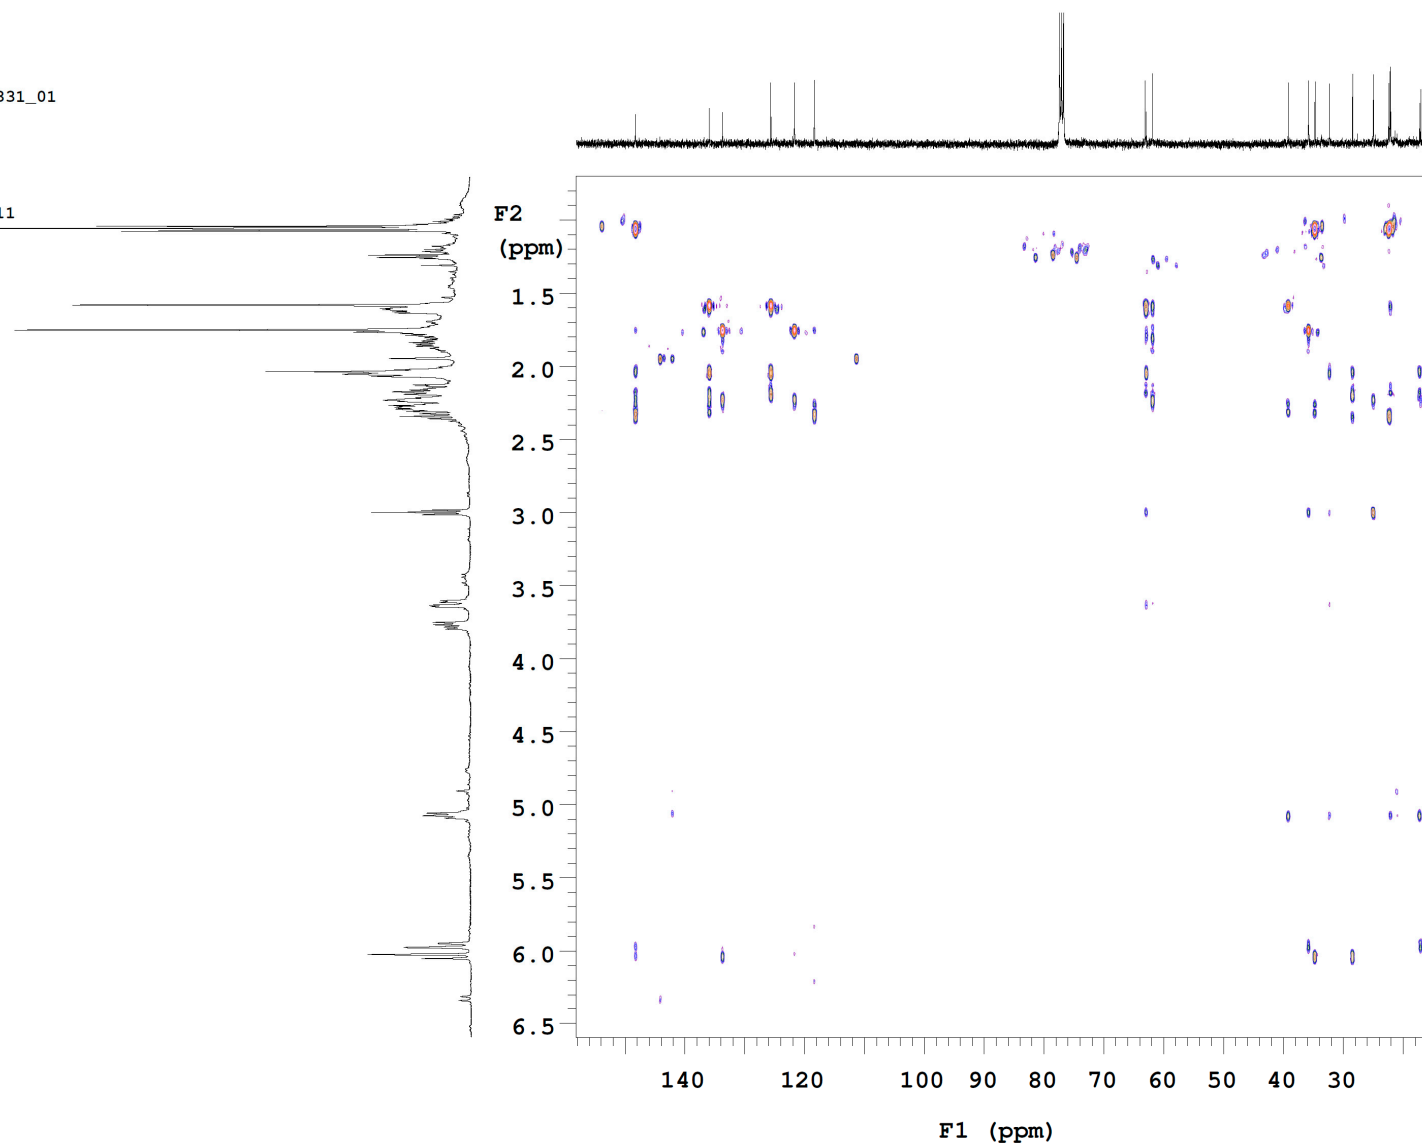

**Figure S28.** HMBC spectrum (400 MHz) of ehrenbergol H (**5**) in CDCl<sub>3</sub>.

Archive directory:  
/home/duh/vnmrsys/data  
Sample directory:  
SST13-14-d-90-85-18\_20110331\_01  
FidFile: data\_gCOSY\_001

Pulse Sequence: gCOSY  
Solvent: cdcl3  
Data collected on: Mar 31 2011

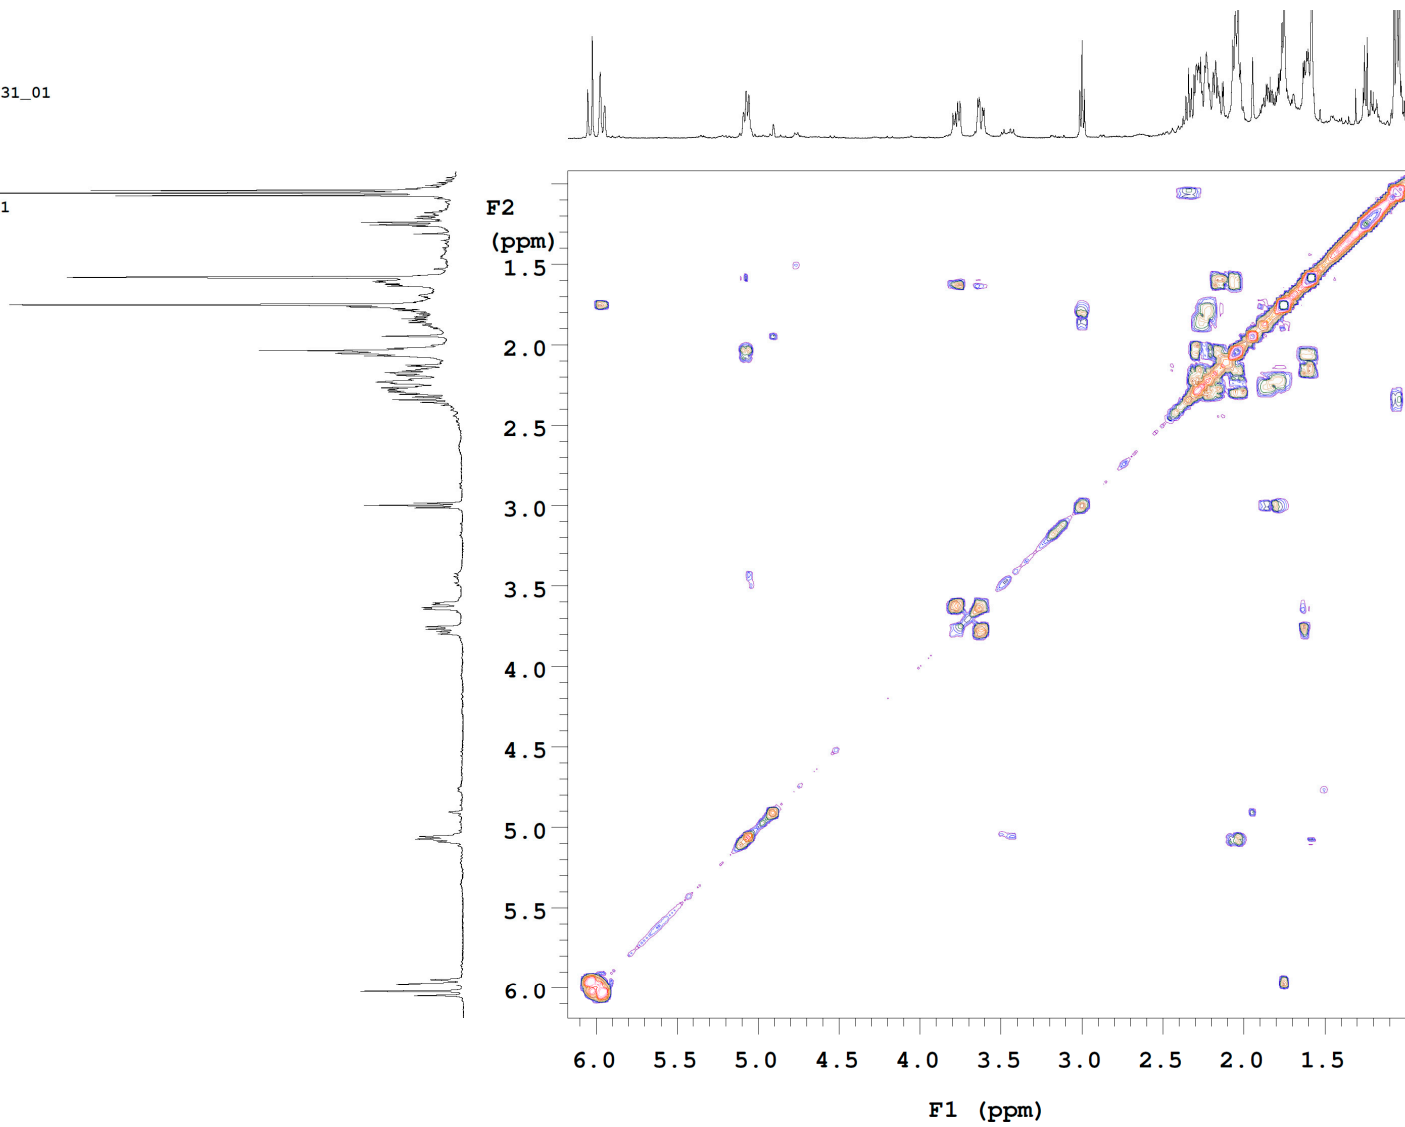

**Figure S29.**  $^1\text{H}$ - $^1\text{H}$  COSY spectrum (400 MHz) of ehrenbergol H (**5**) in  $\text{CDCl}_3$ .

Archive directory:  
/home/duh/vnmrsys/data  
Sample directory:  
SST13-14-d-90-85-18\_20110331\_01  
FidFile: data\_NOESY\_001

Pulse Sequence: NOESY  
Solvent: cdcl3  
Data collected on: Mar 31 2011

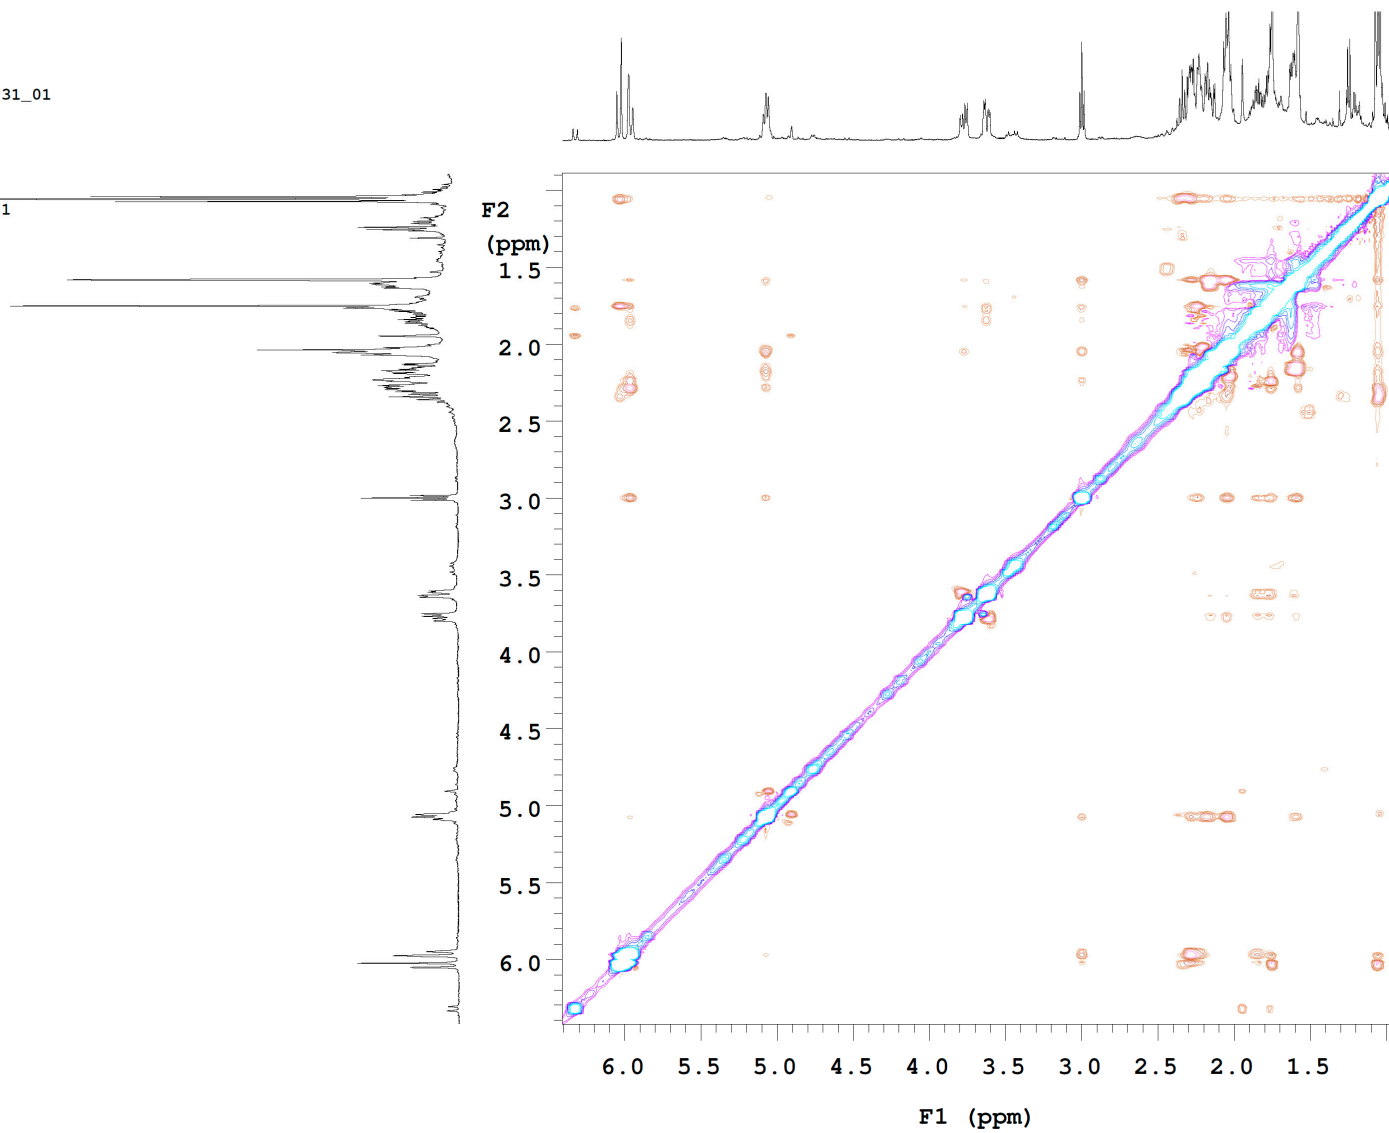

**Figure S30.** NOESY spectrum (400 MHz) of ehrenbergol H (**5**) in CDCl<sub>3</sub>.
